# Supplementary material for: Proteins and lunasin from Glycine soja inhibited inflammation by activating the Hippo pathway through phosphorylation of YAP1 kinase
Source: Royal Society of Chemistry journal article supplement (doi:10.1039/d5fo02971f), 2026-01-01

Figure 5A

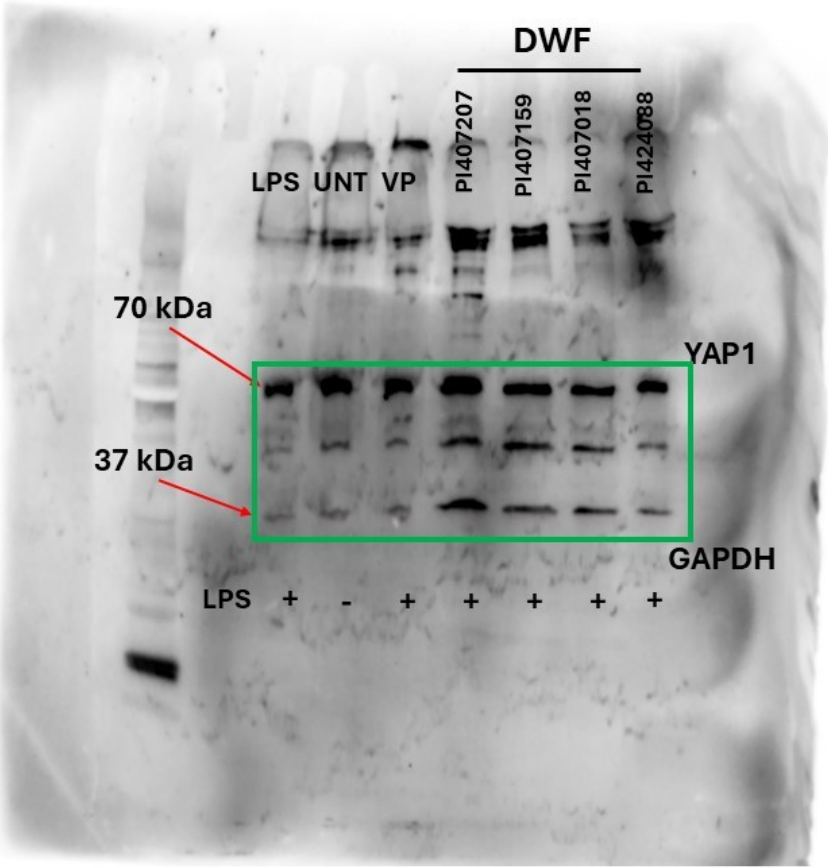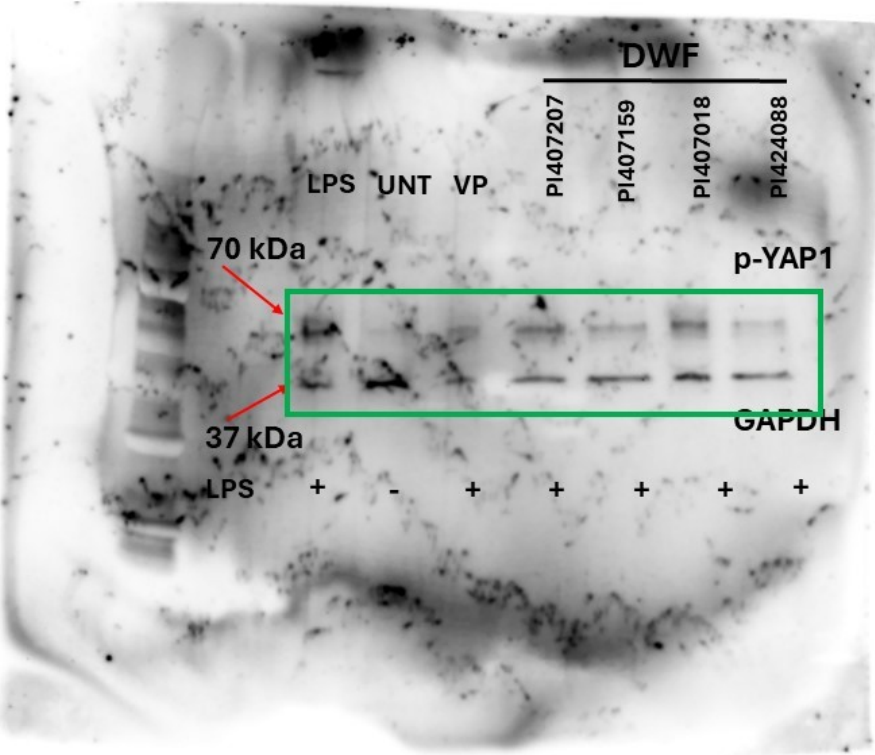

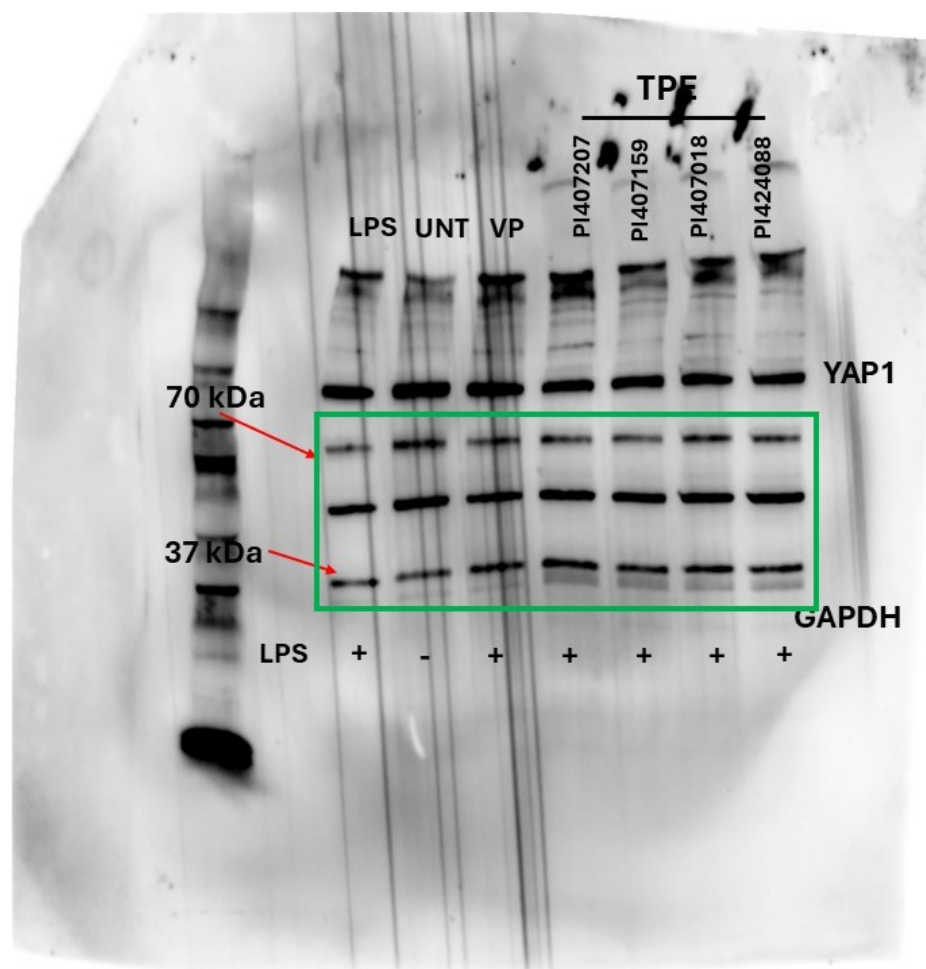

Figure 5B

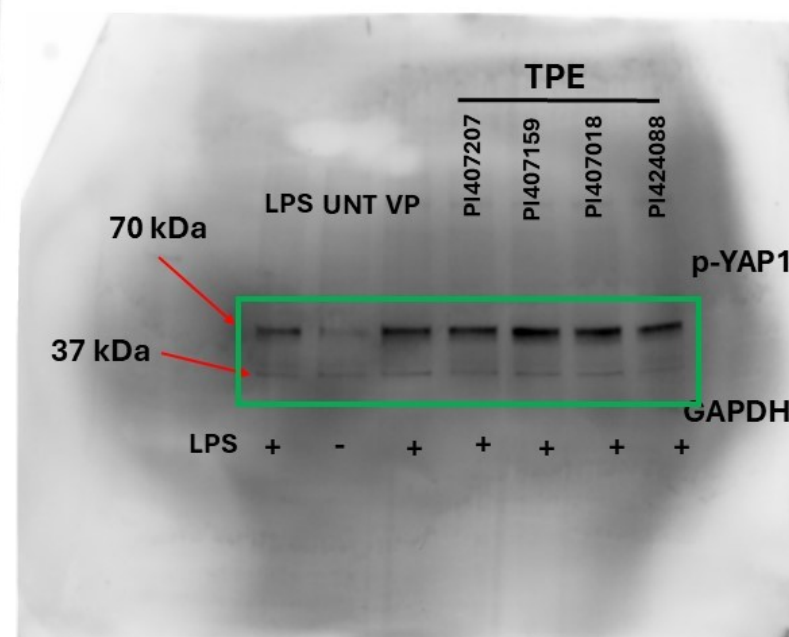

Figure 5C

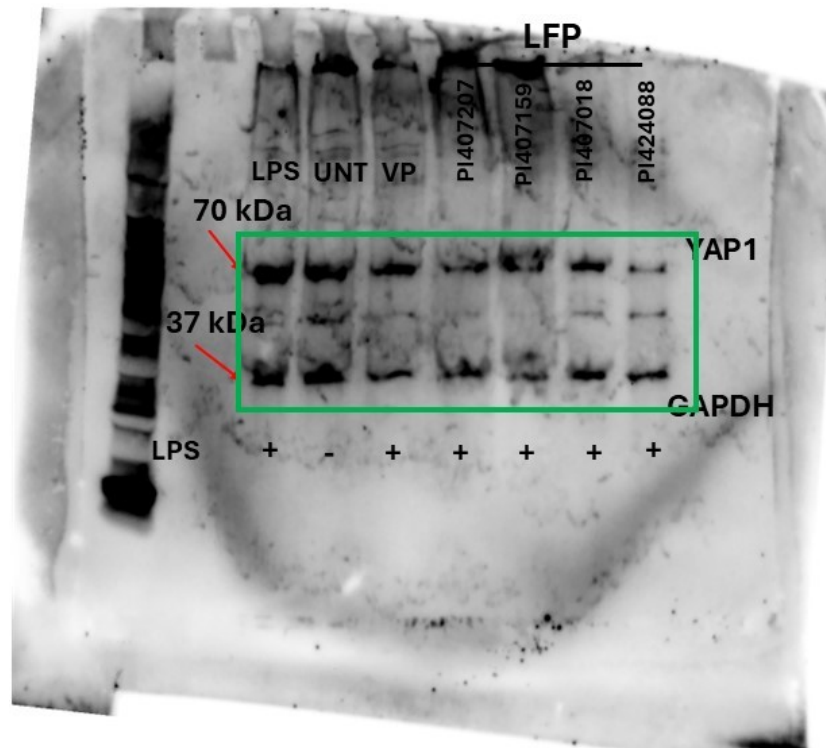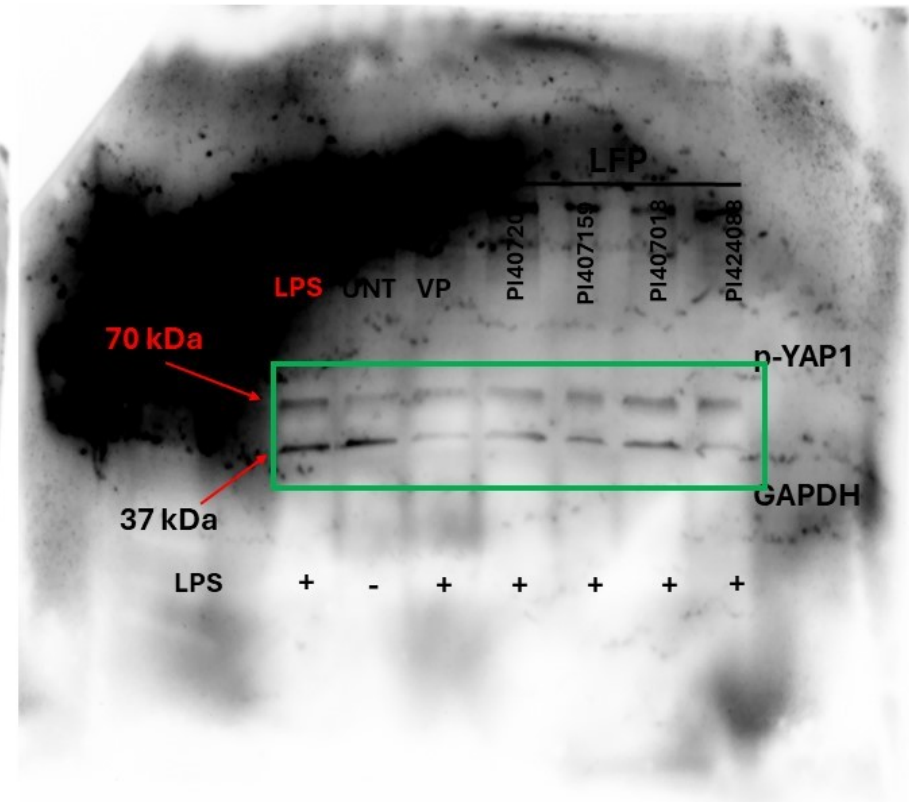

Western blot analysis showing the effect of LPS and various PI3K inhibitors on YAP1 phosphorylation. The blot displays bands for p-YAP1 (70 kDa) and GAPDH (37 kDa). A green box highlights the p-YAP1 bands. Red arrows indicate the 70 kDa and 37 kDa markers. The lanes are labeled LPS, UNT, VP, and ELPE (PI407207, PI407159, PI407018, PI424088). LPS is present in all lanes except the first (UNT).

| Lane | LPS | UNT | VP | ELPE     |
|------|-----|-----|----|----------|
| 1    | -   | +   | -  | PI407207 |
| 2    | +   | -   | -  | PI407159 |
| 3    | +   | -   | -  | PI407018 |
| 4    | +   | -   | -  | PI424088 |

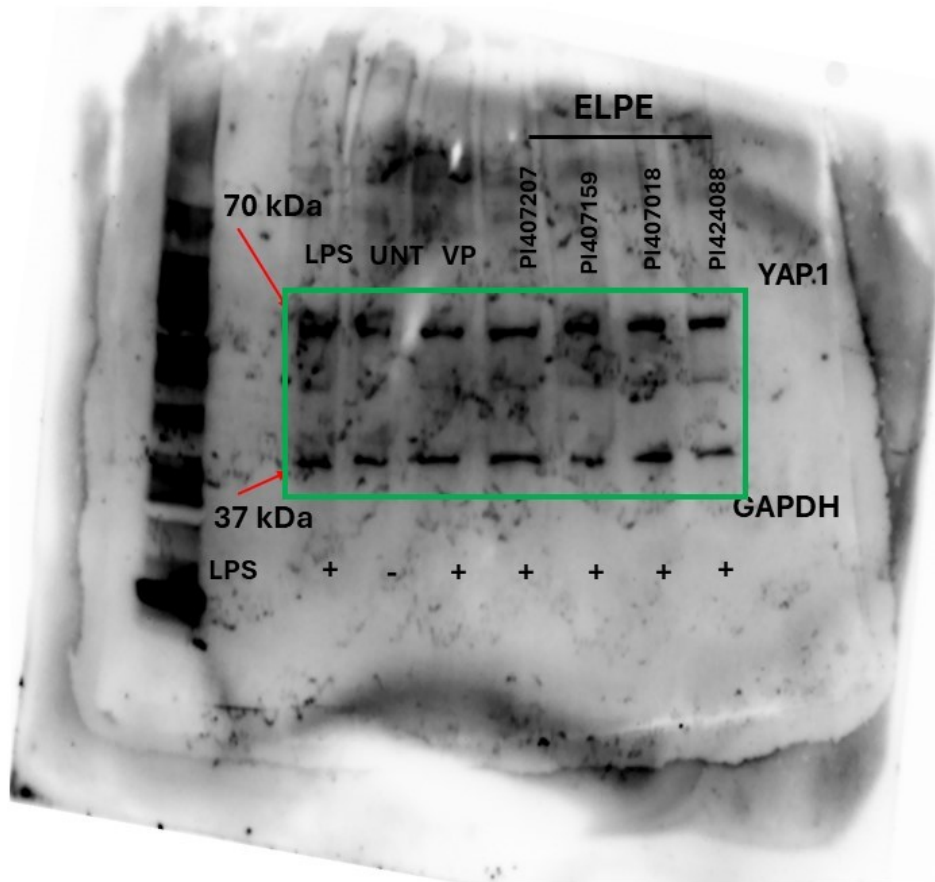

Figure 5E

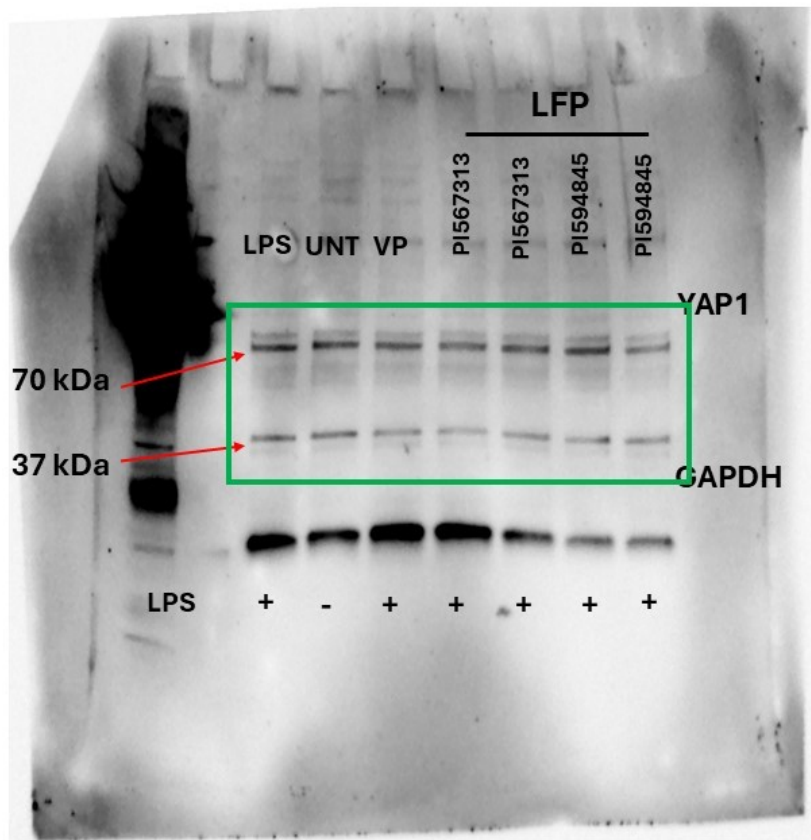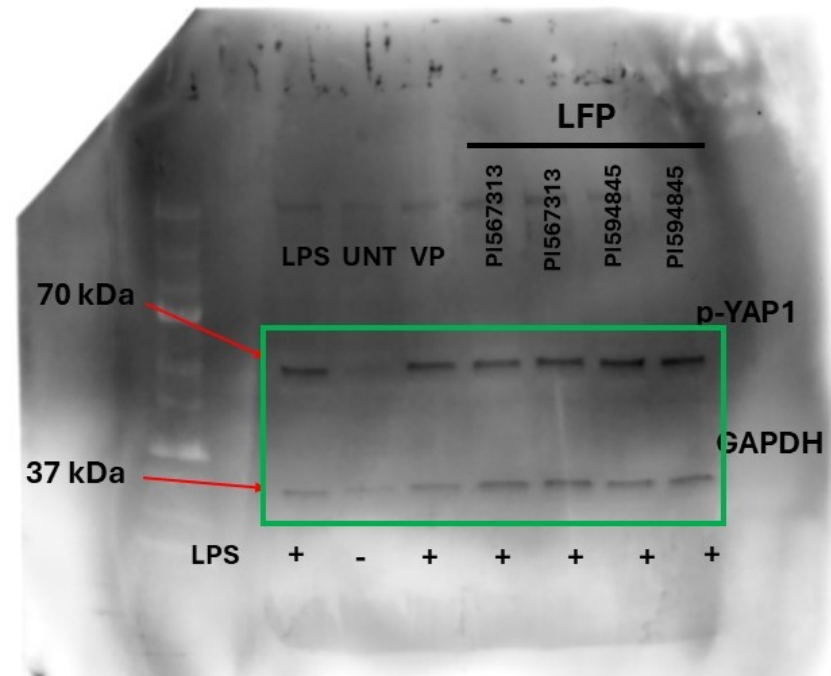

Figure 5F

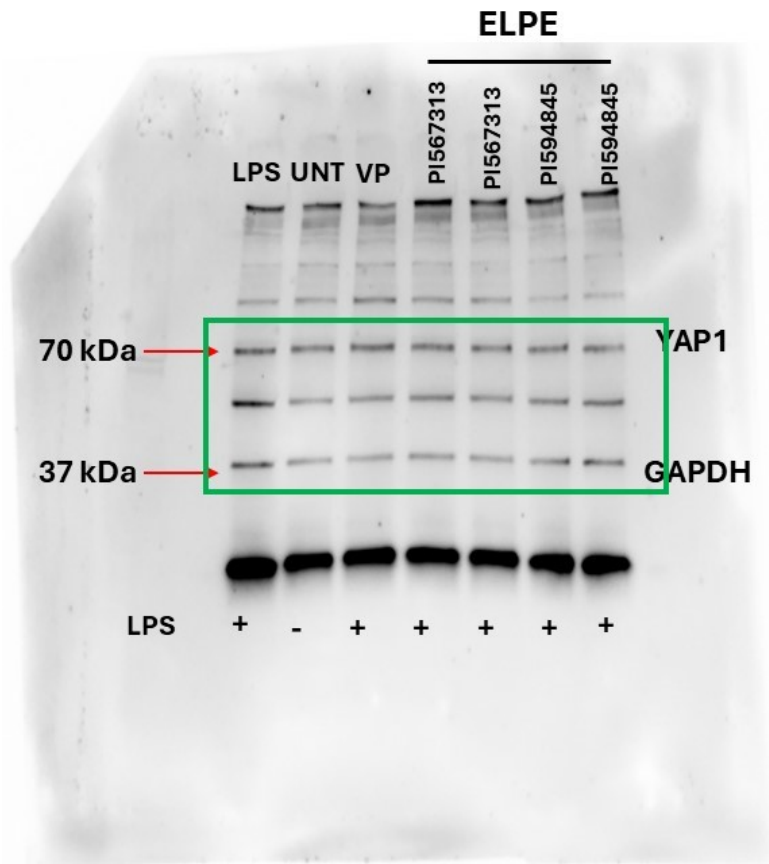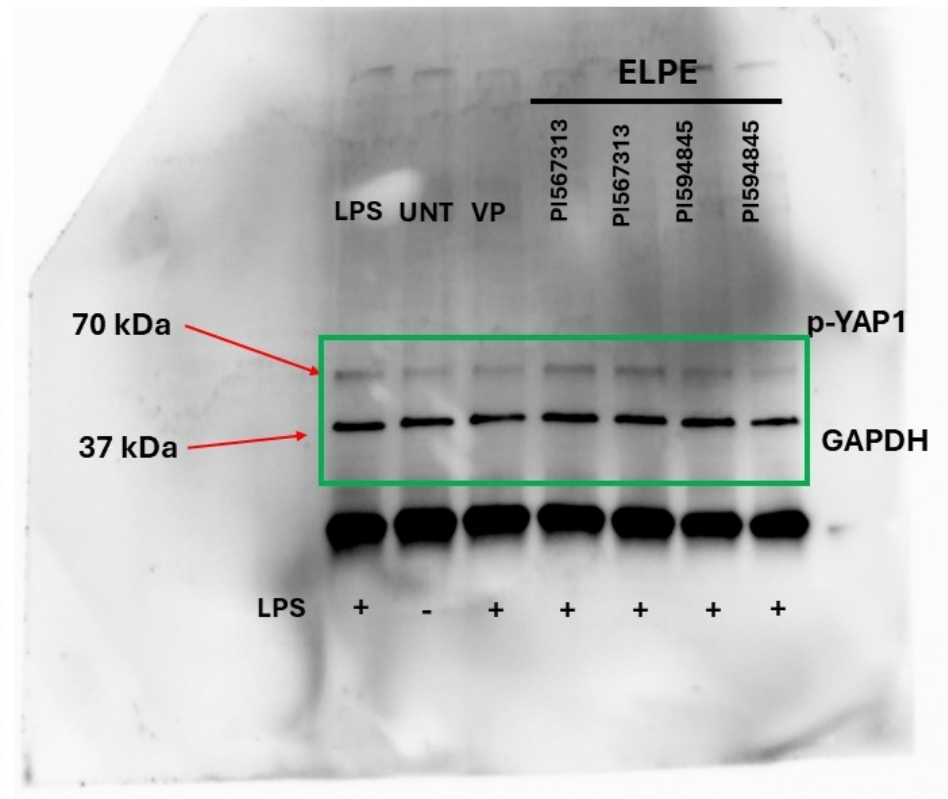



Figure 6A

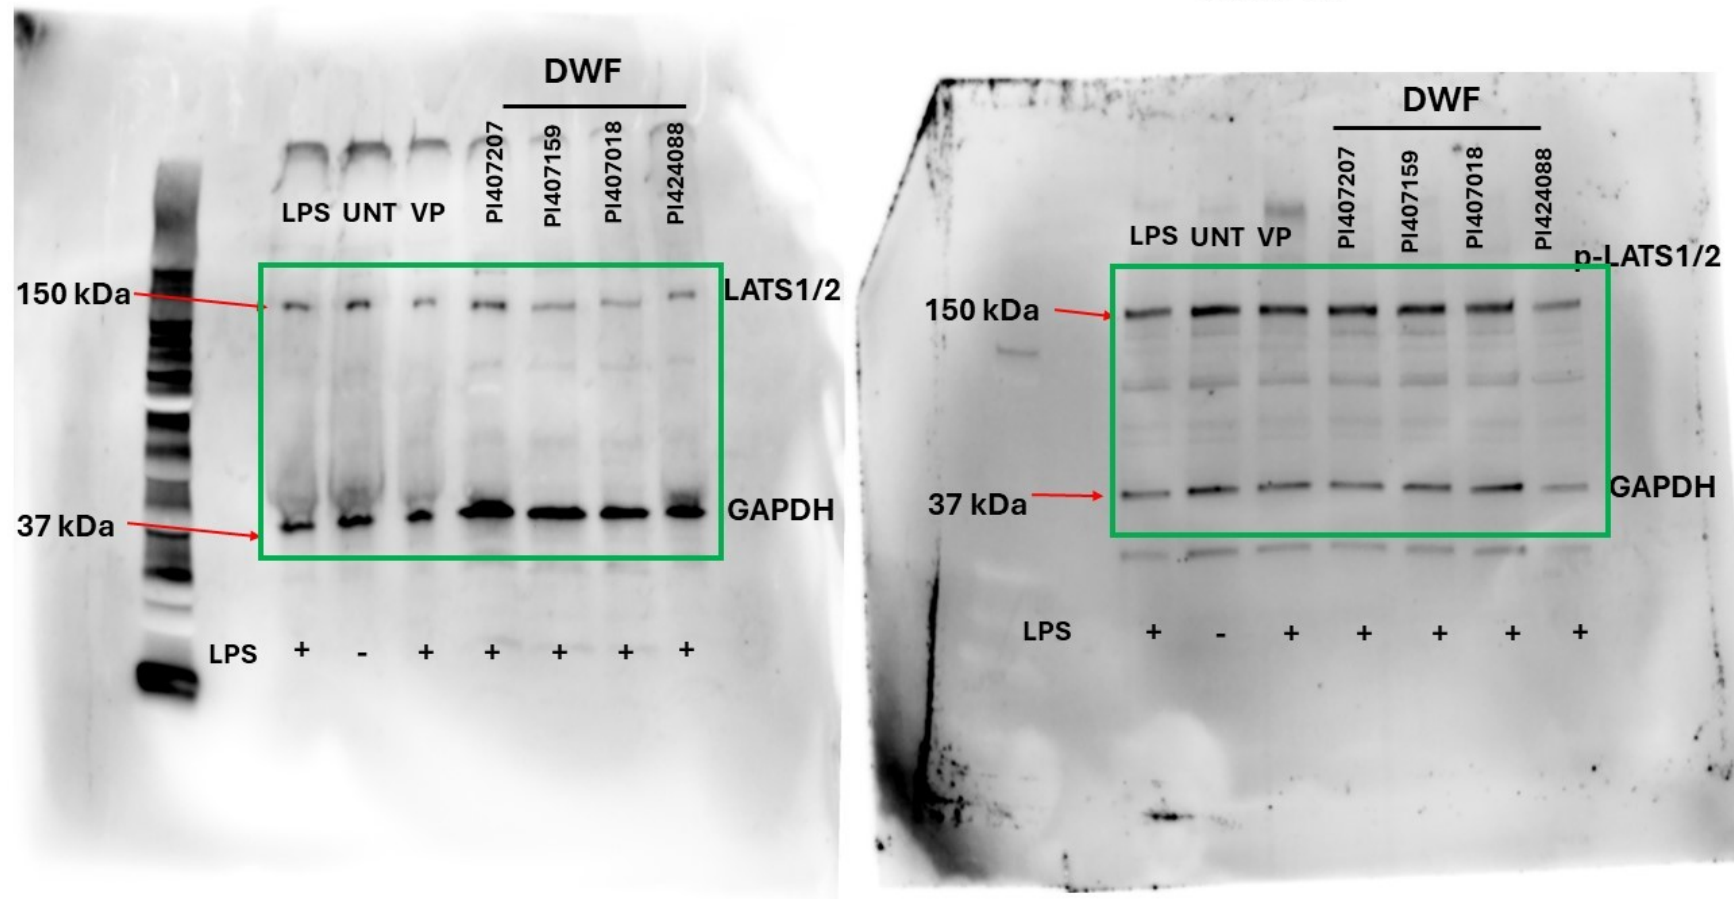

Figure 6B

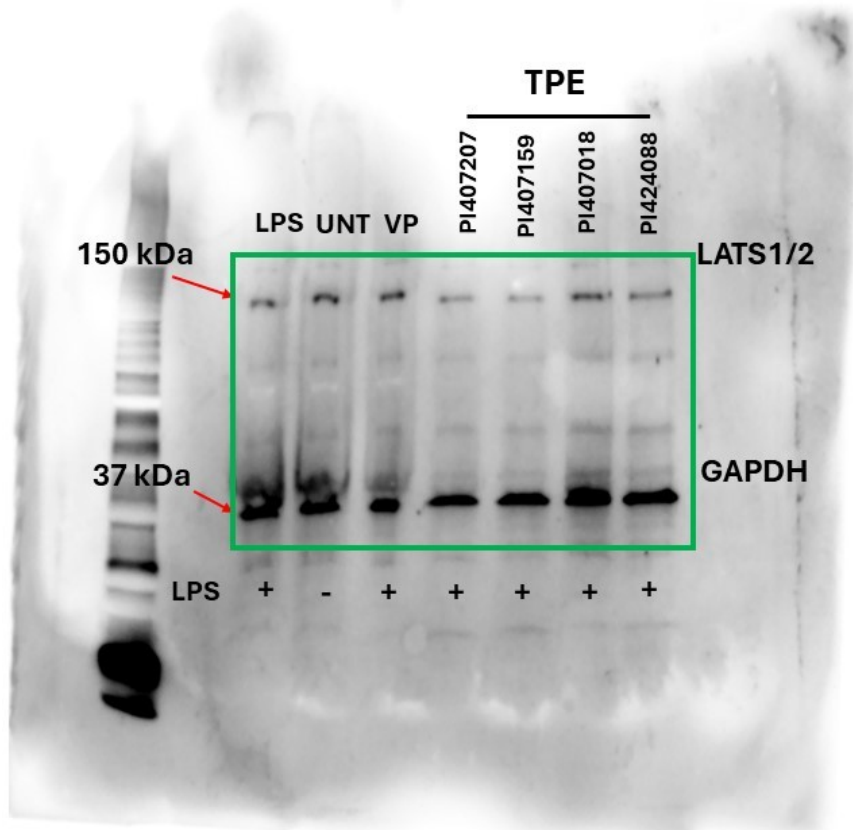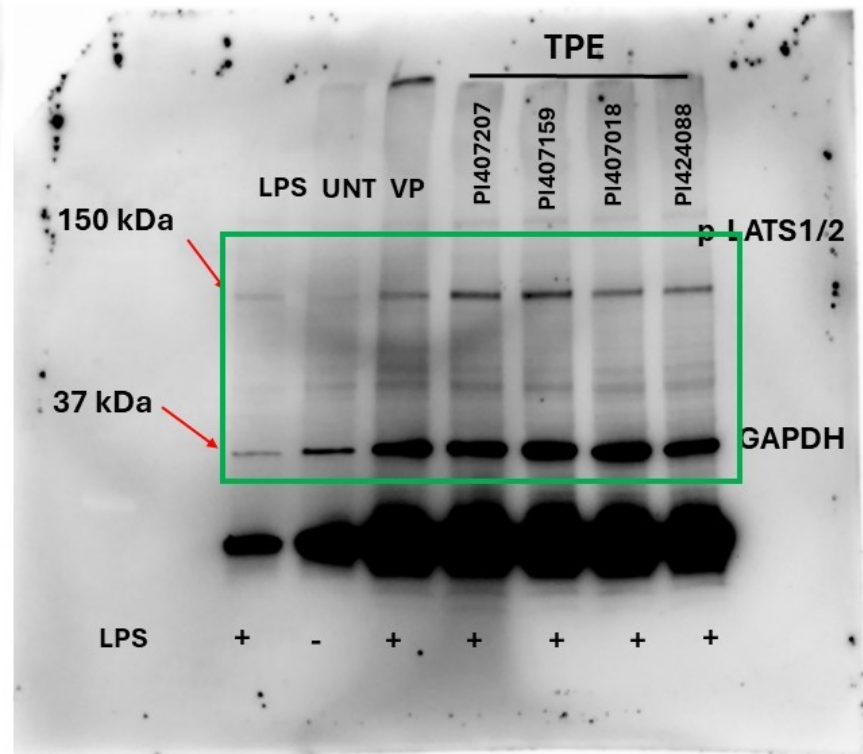



Figure 6C

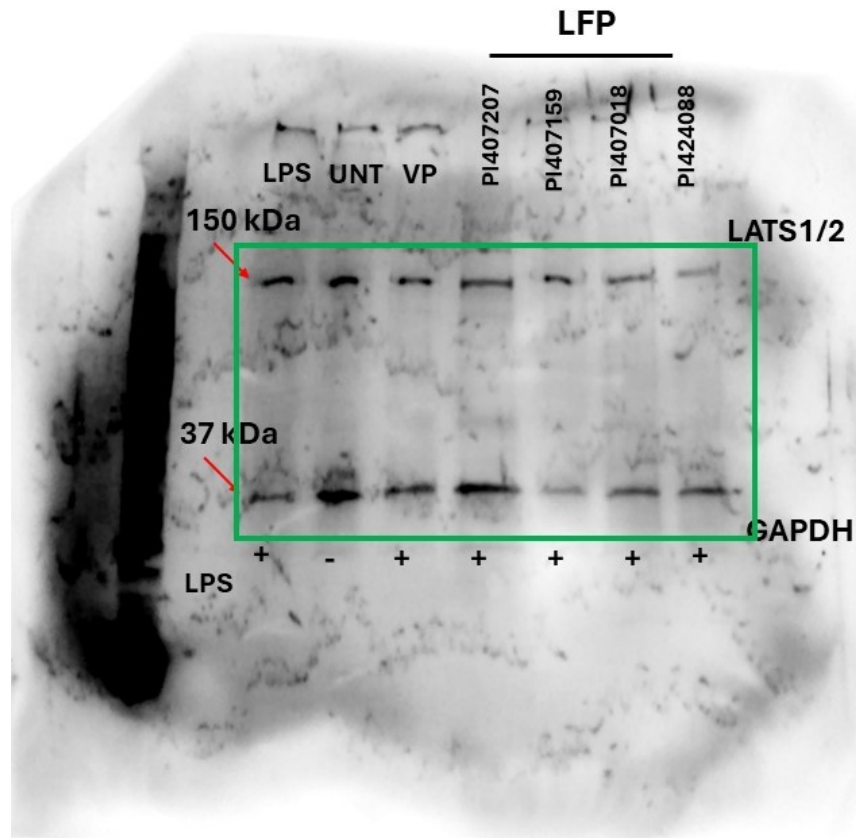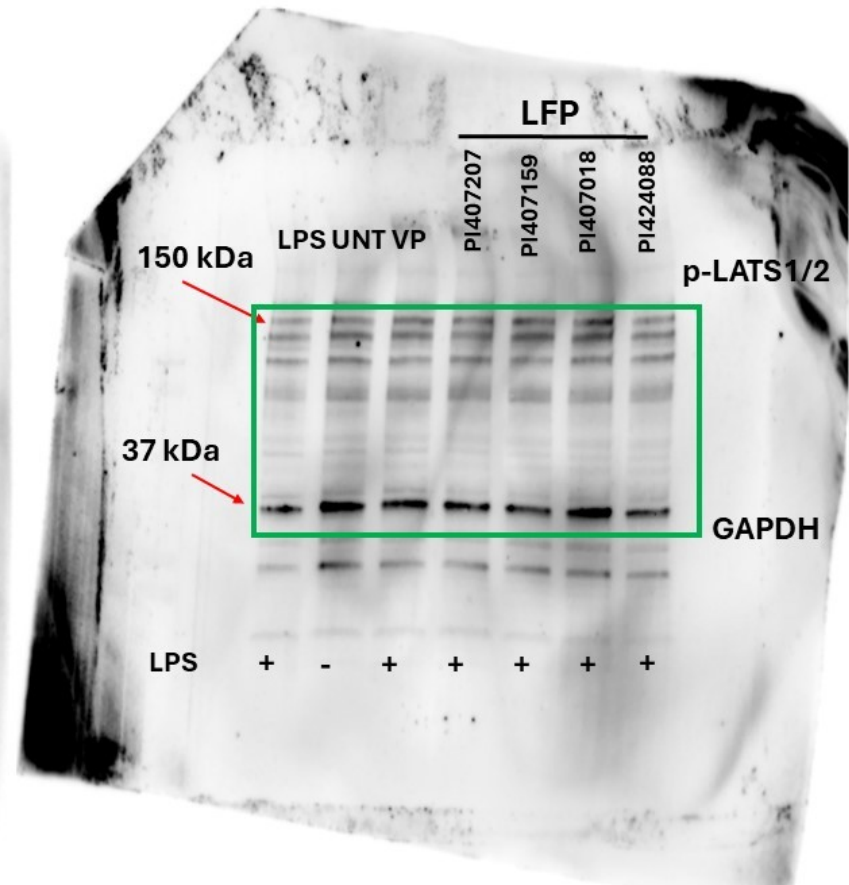

Figure 6D

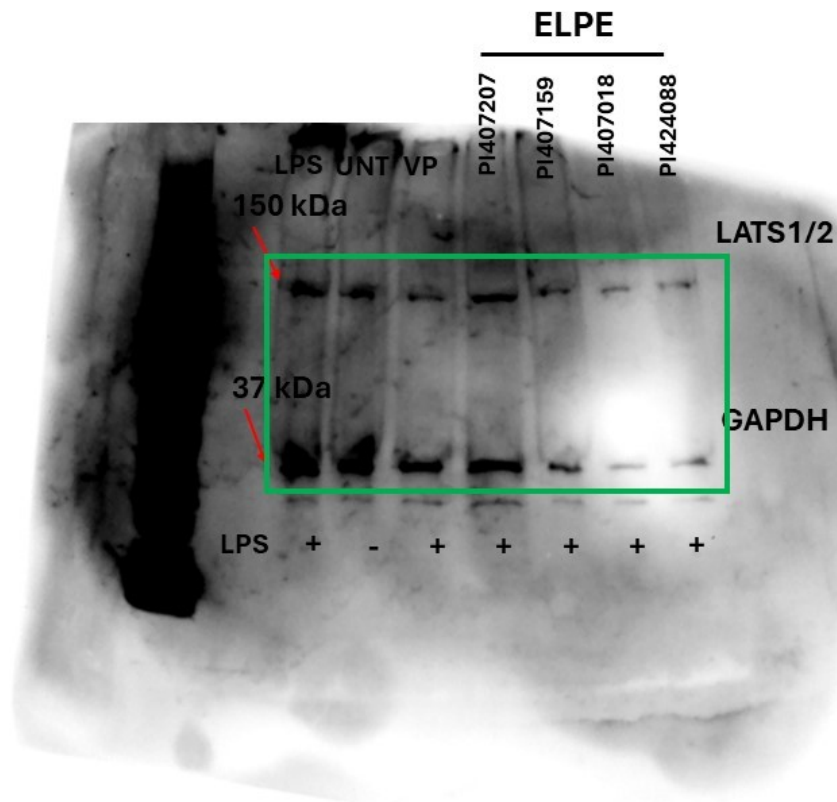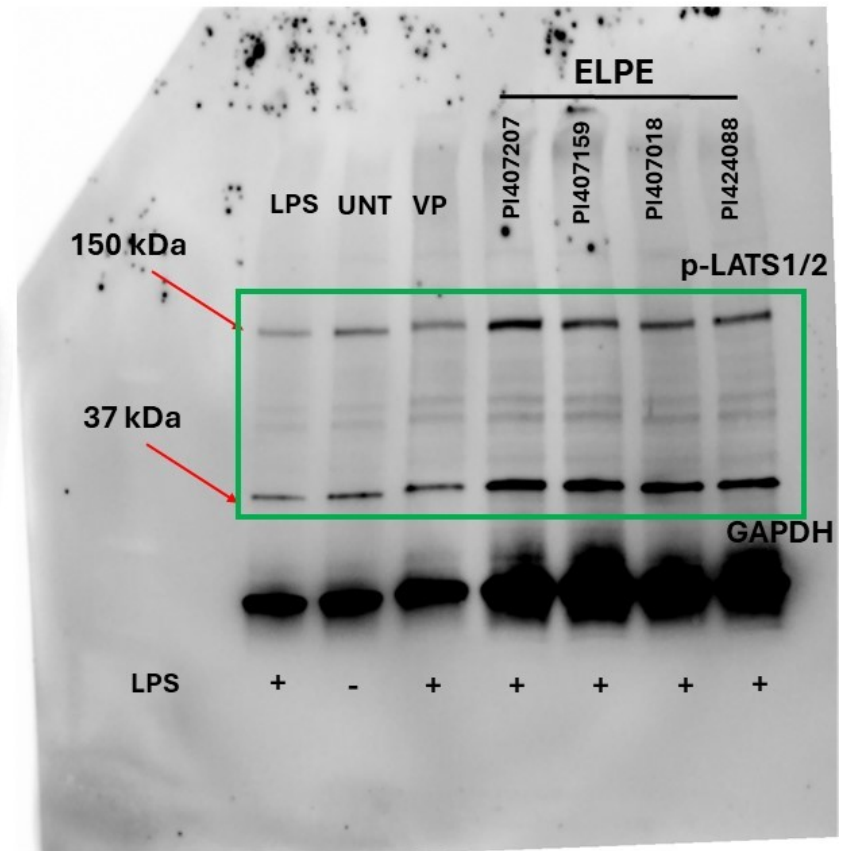

Figure 6E

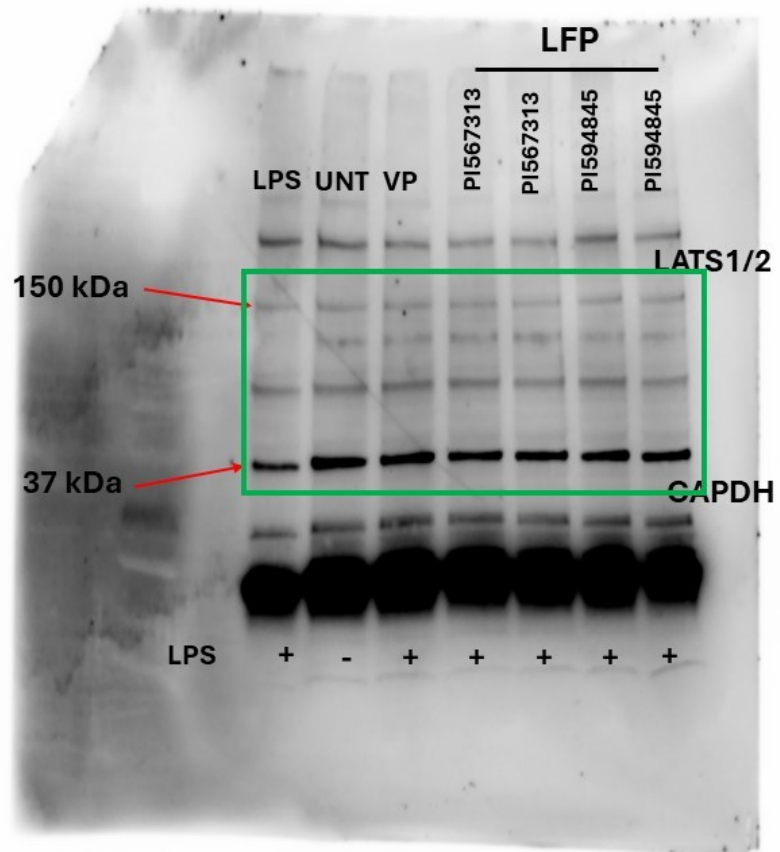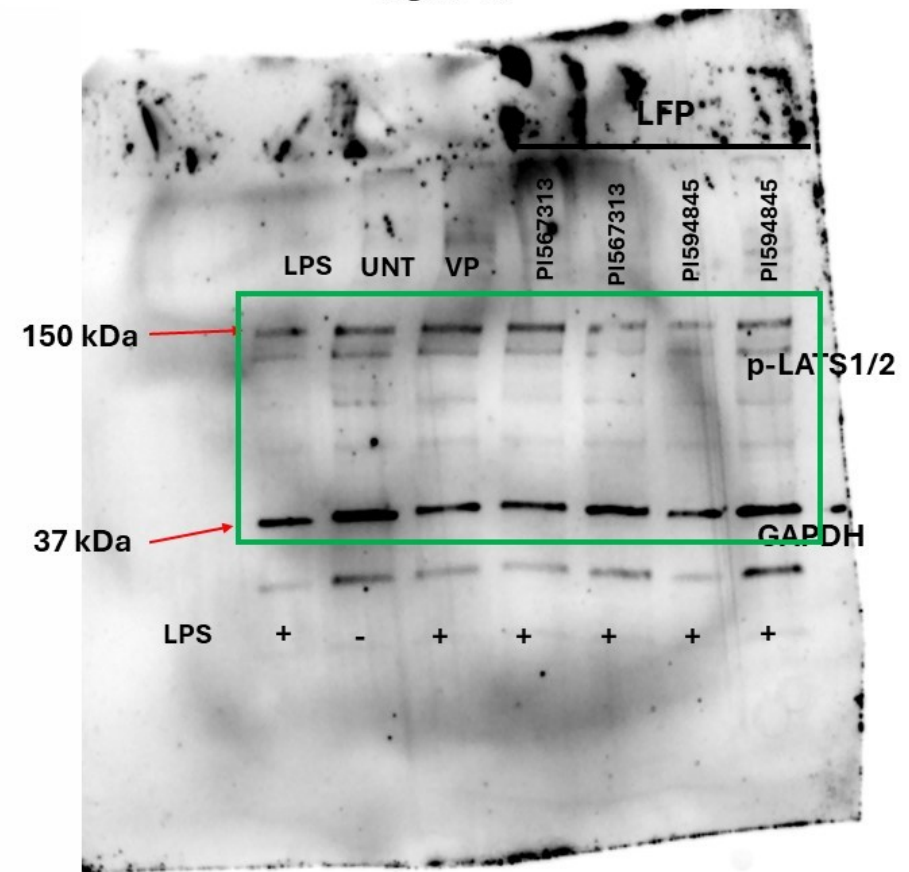

Figure 6F

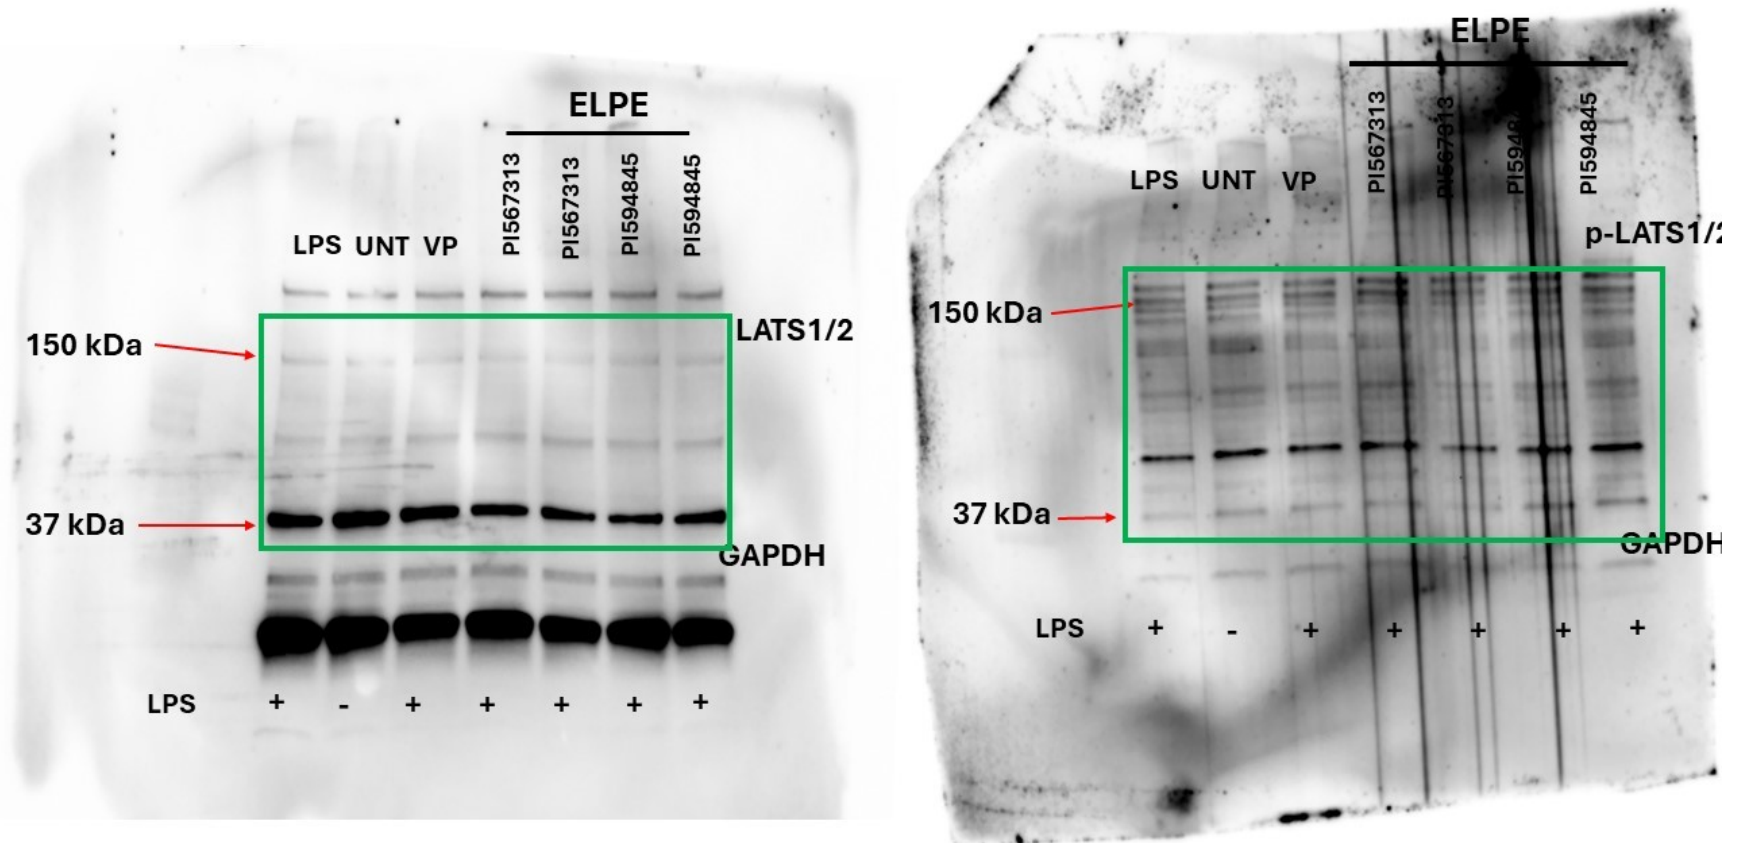

Figure 7A

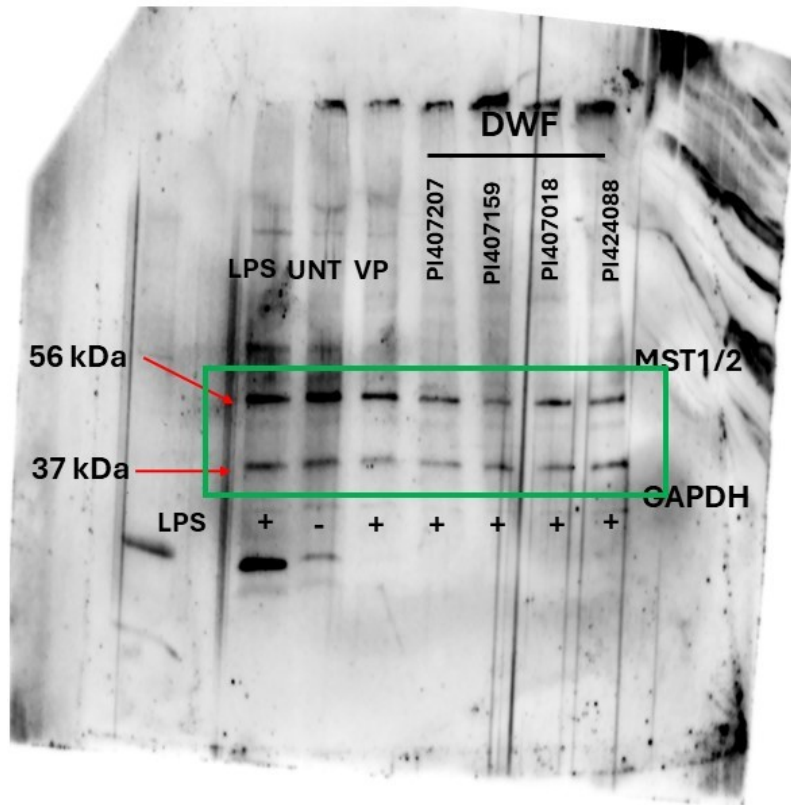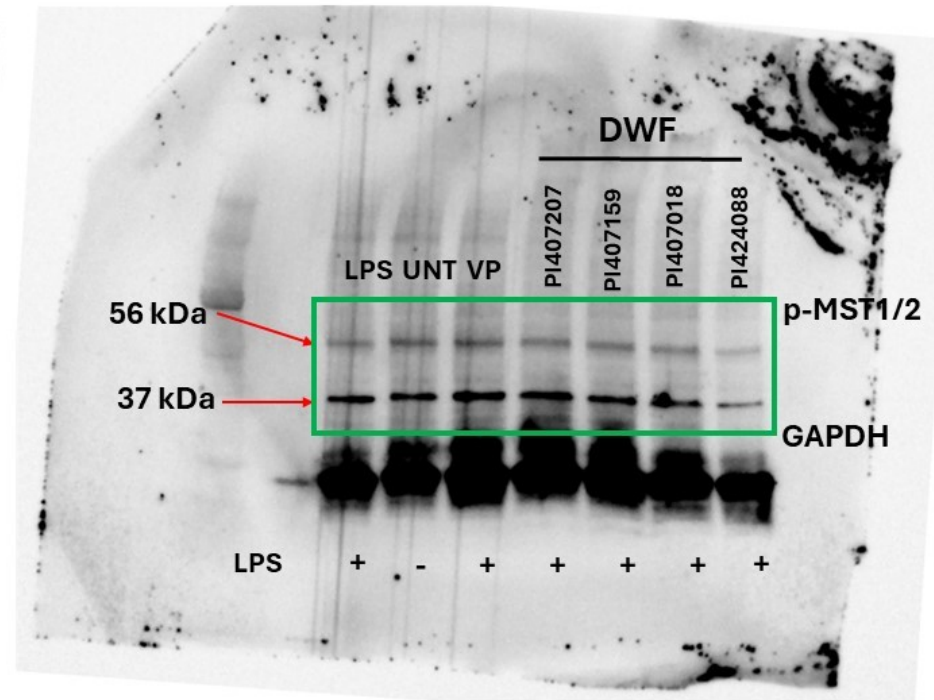



Figure 7B

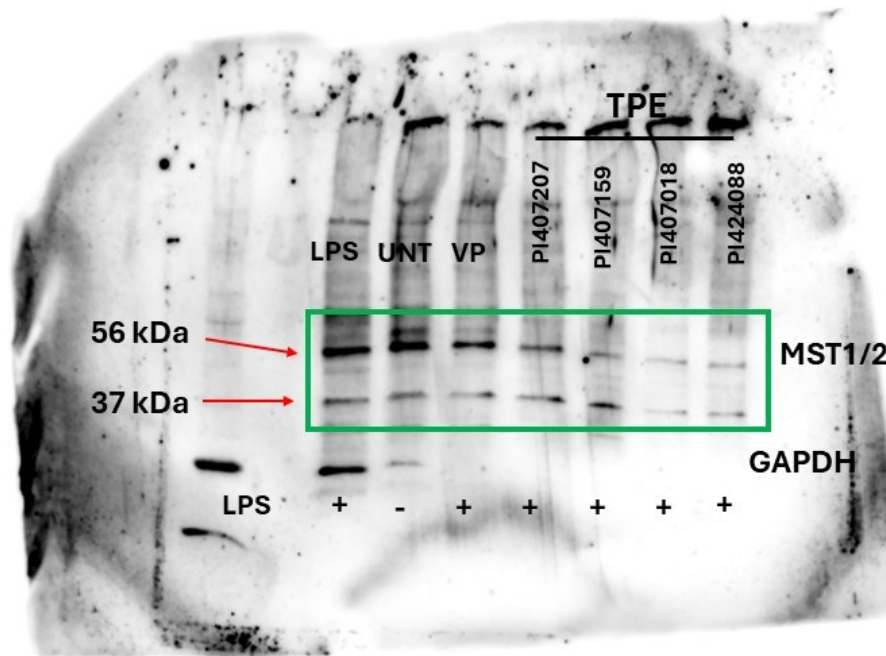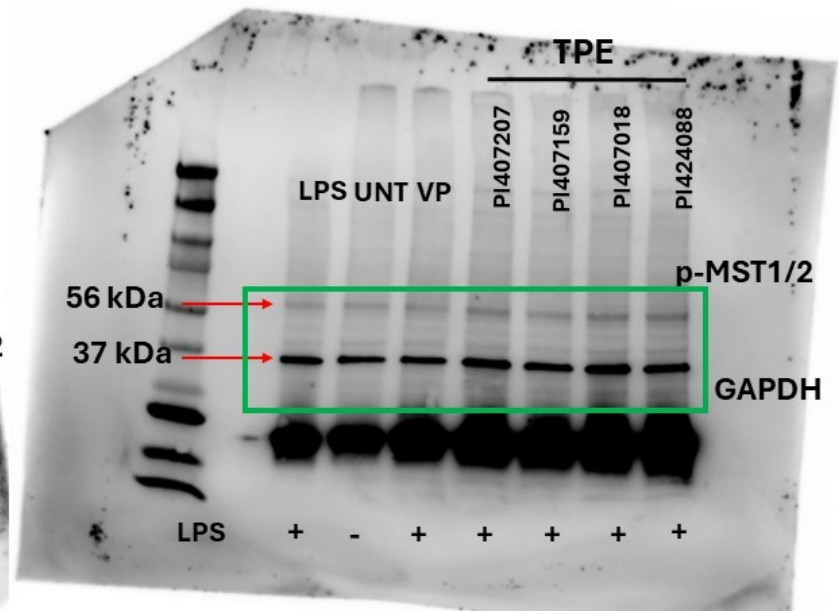



Figure 7C

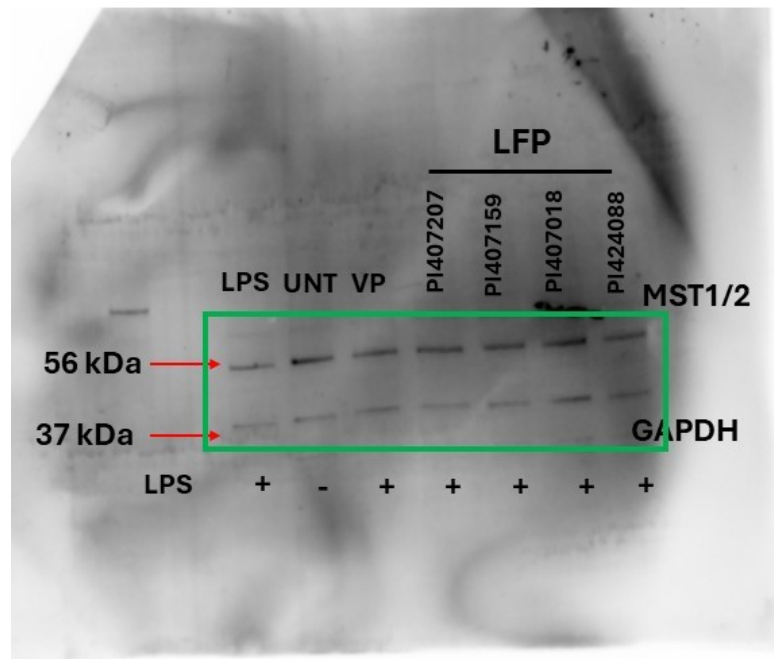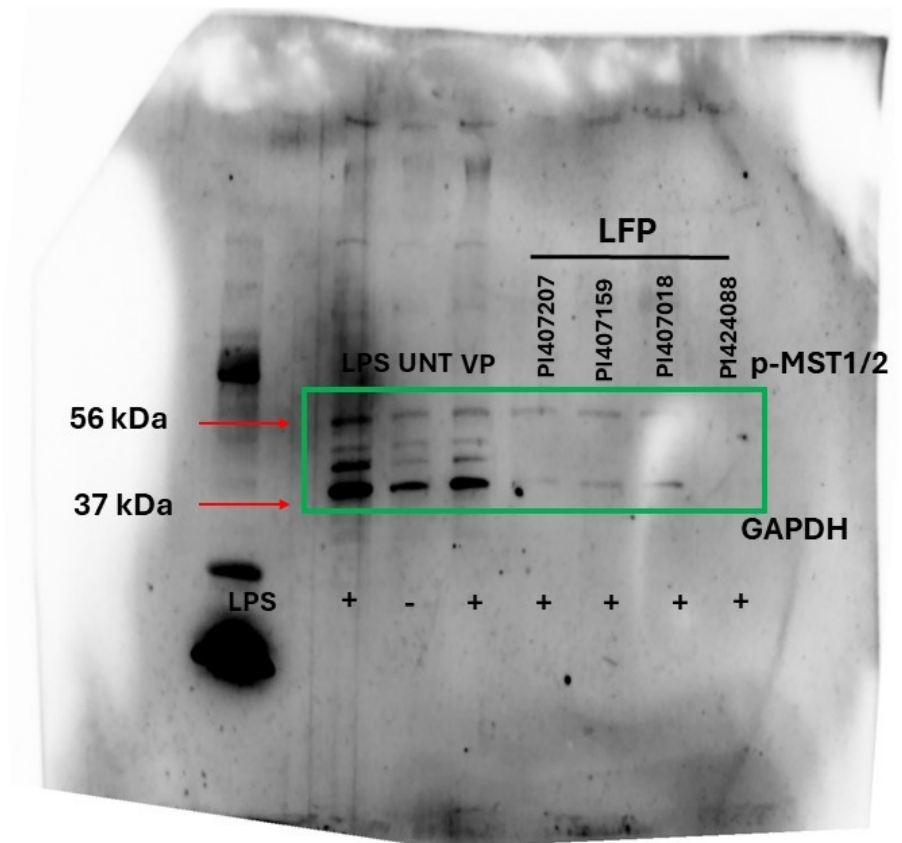

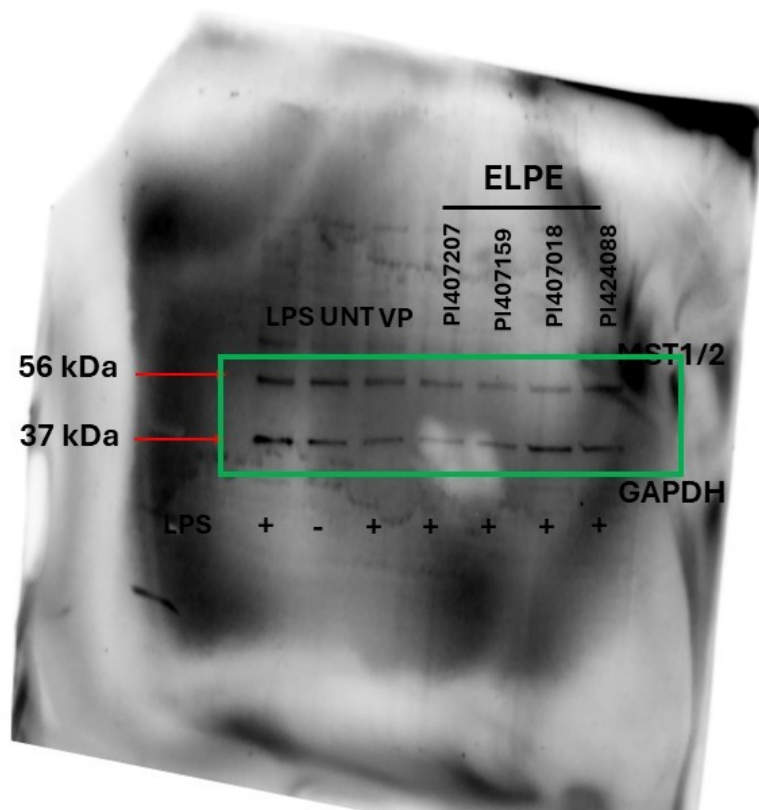

Figure 7D

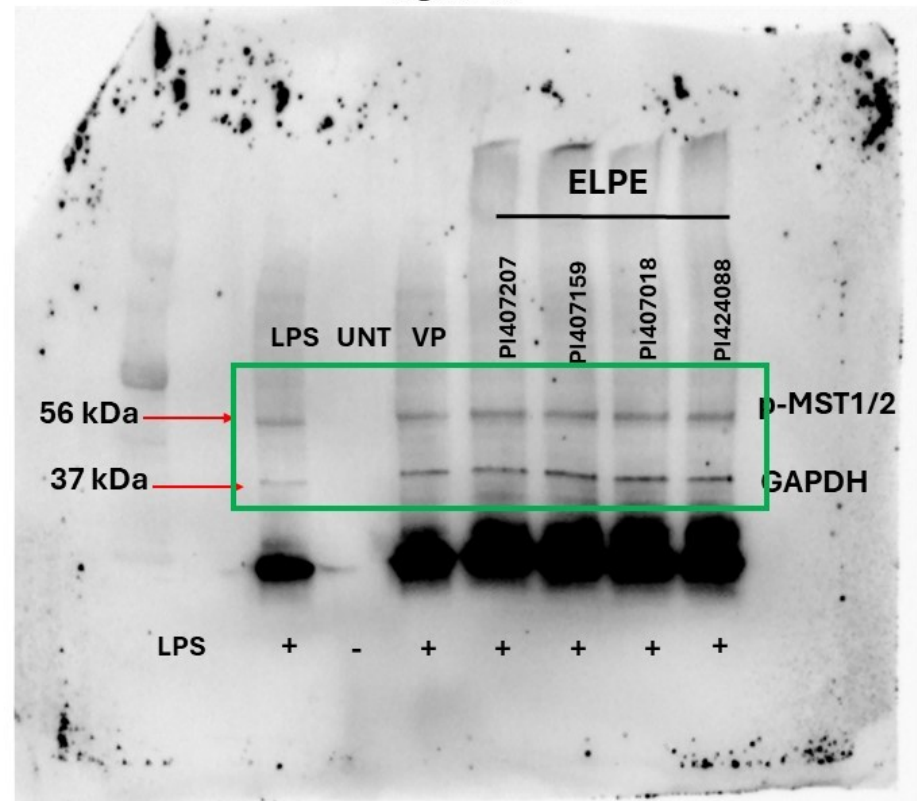

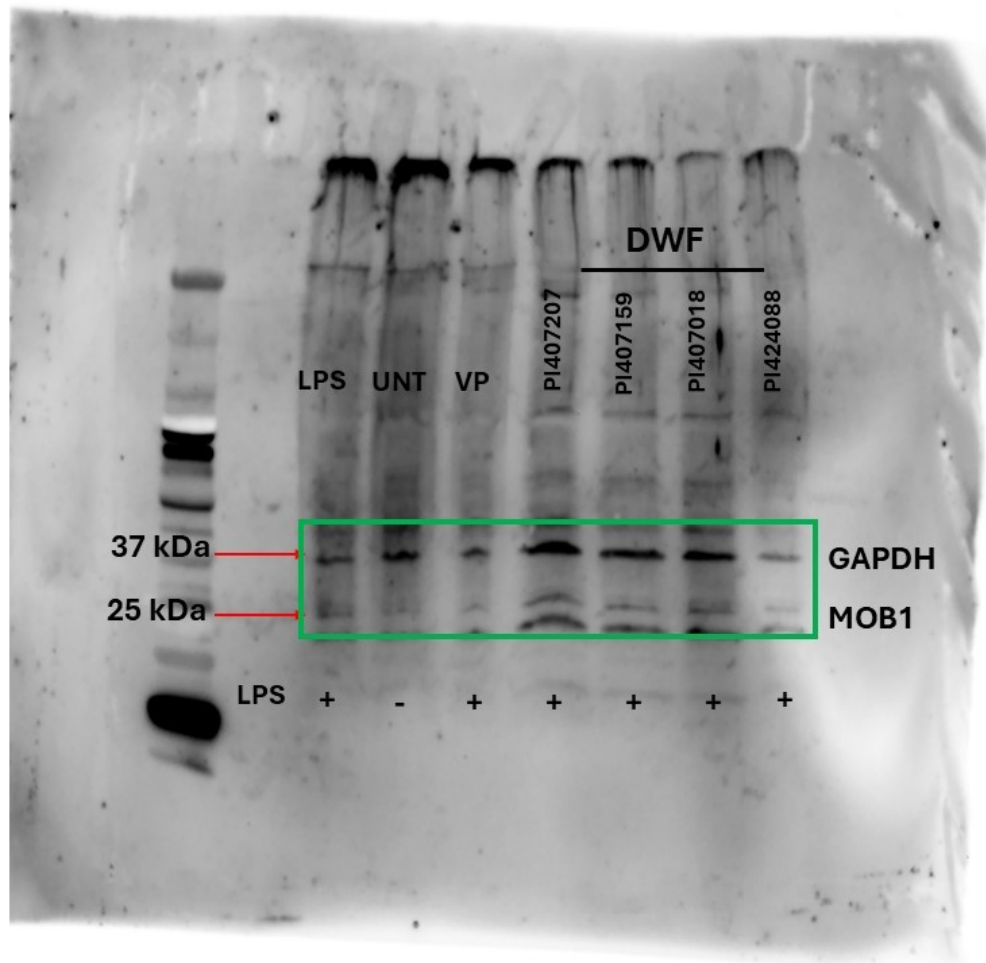

Figure 8A

Figure 8B

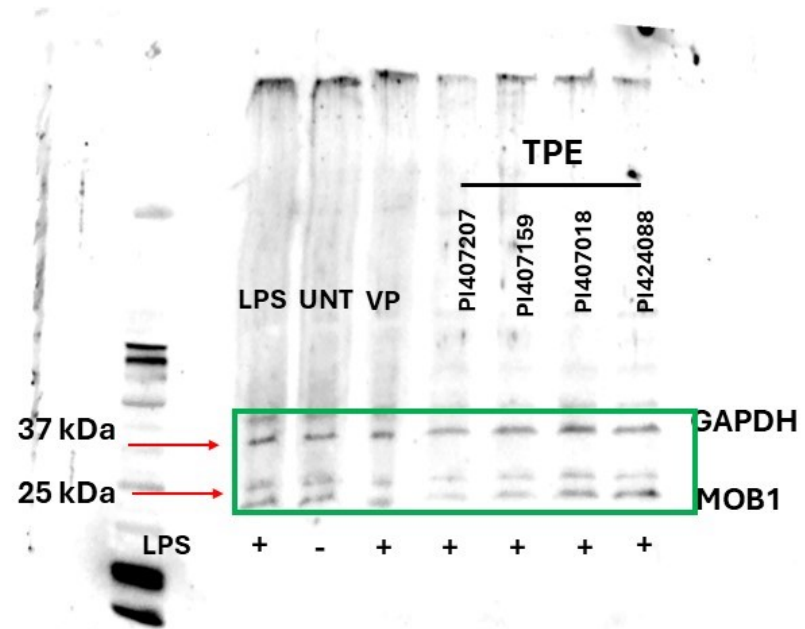

Figure 8C

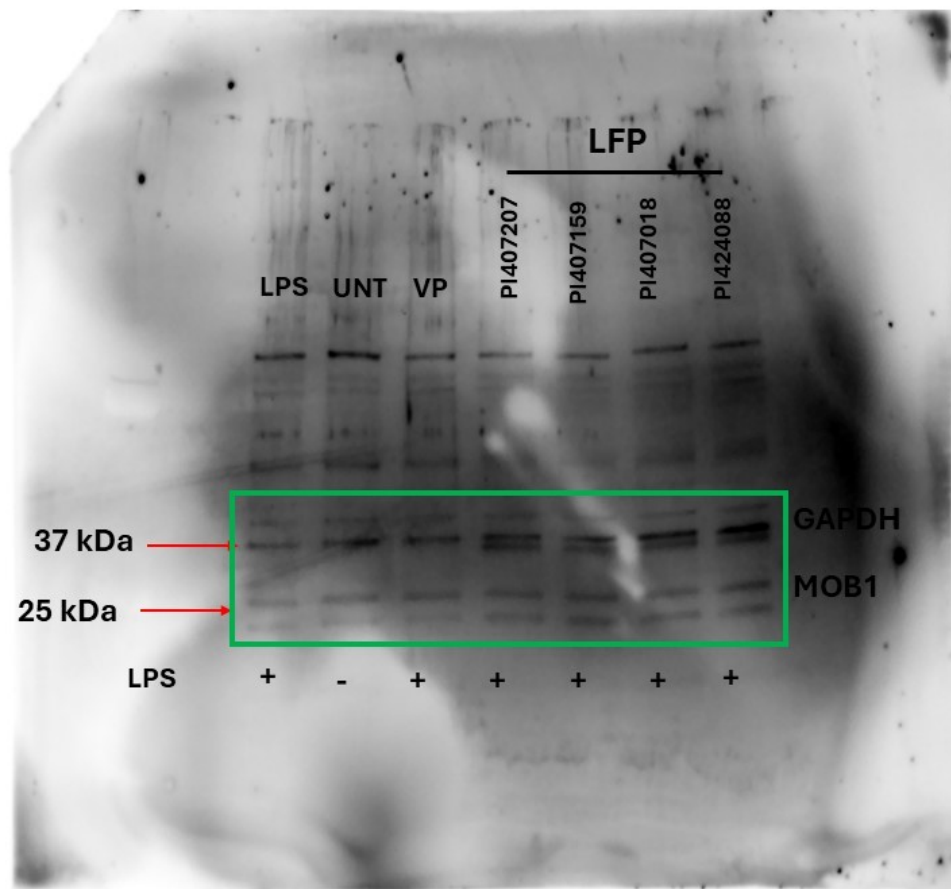

Figure 8D

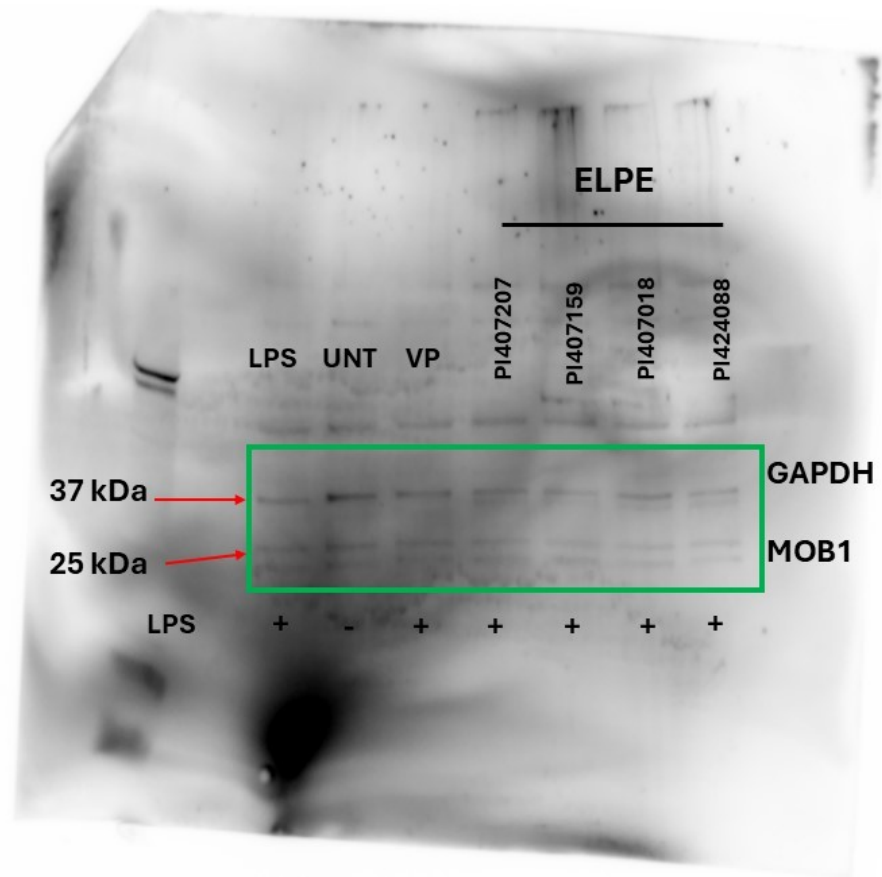



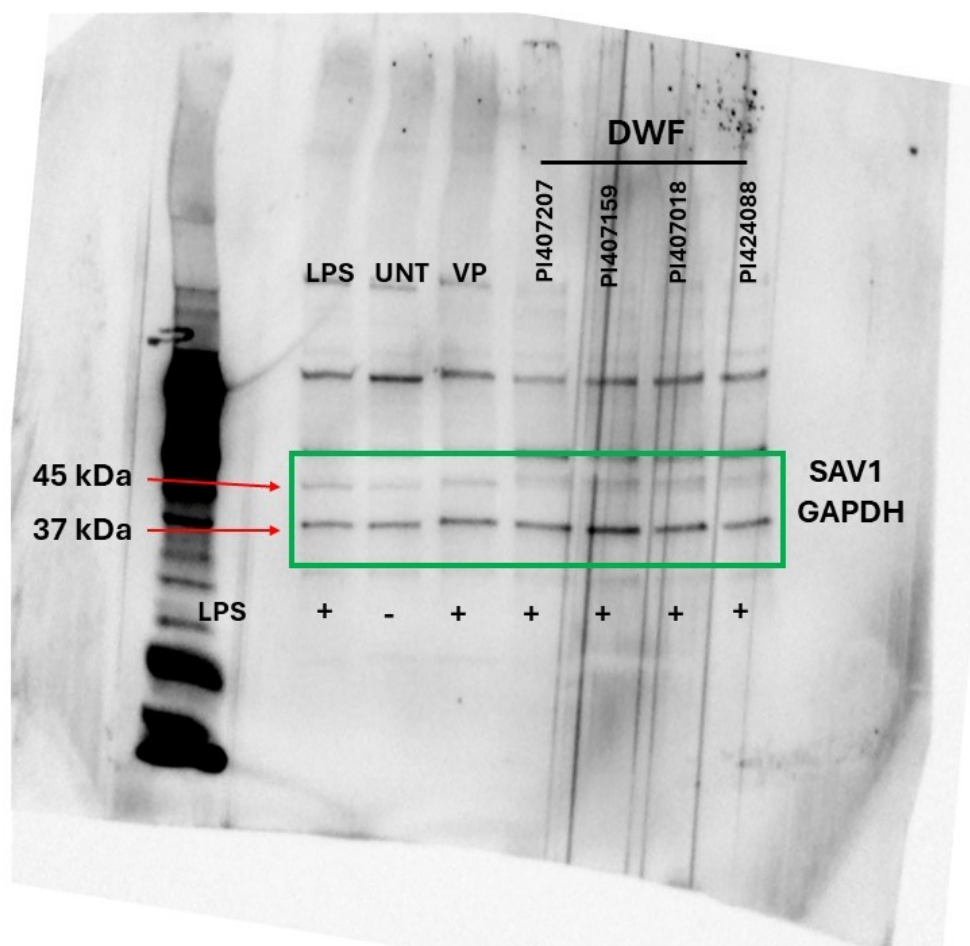

Figure 9A

Figure 9B

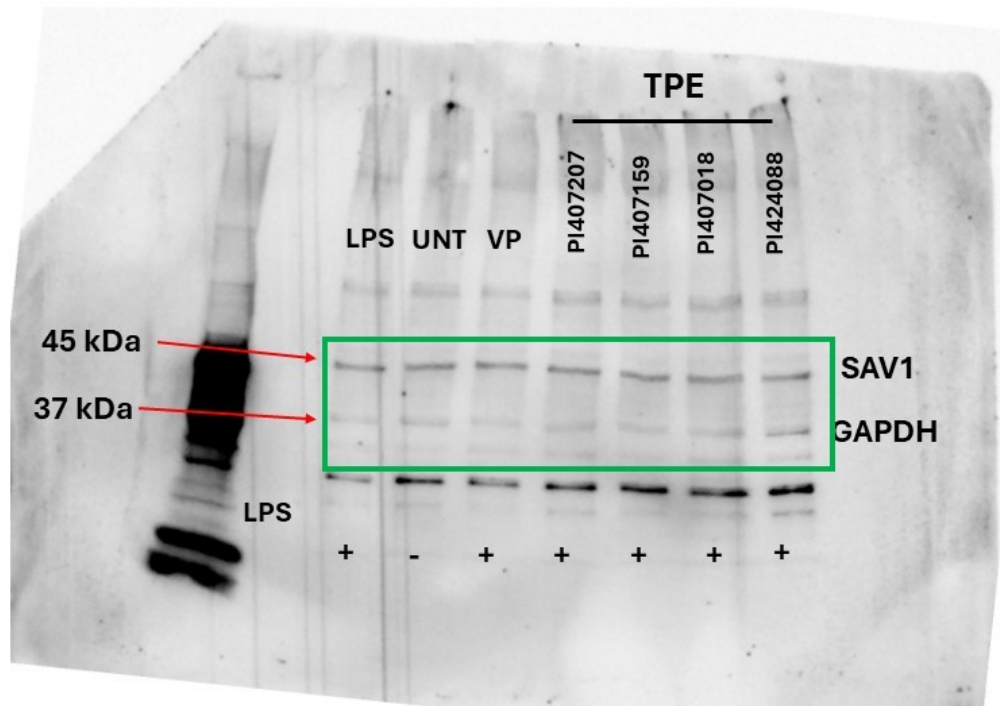

Figure 9C

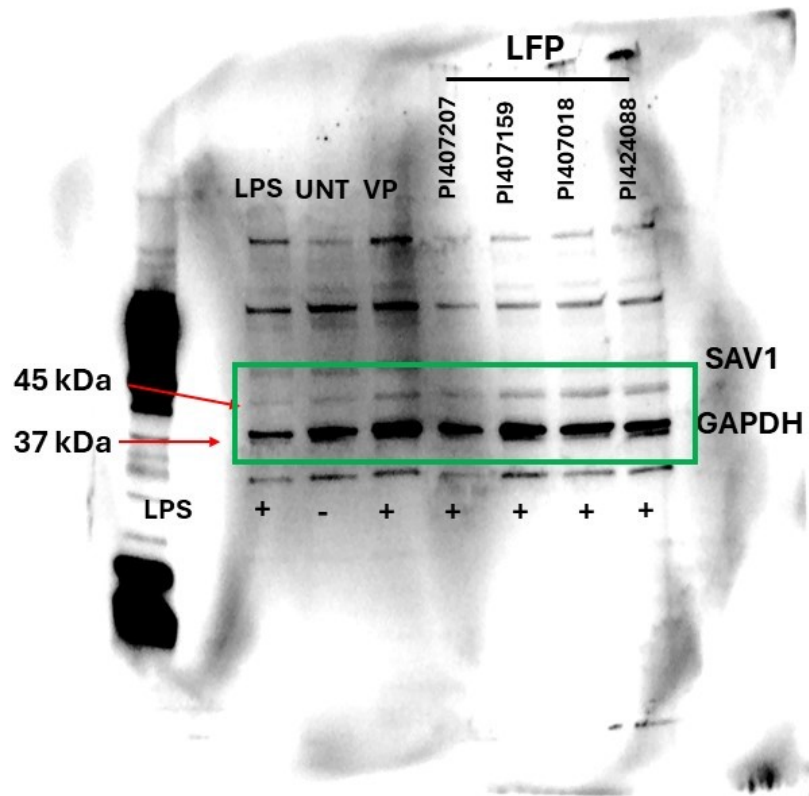

Figure 9D

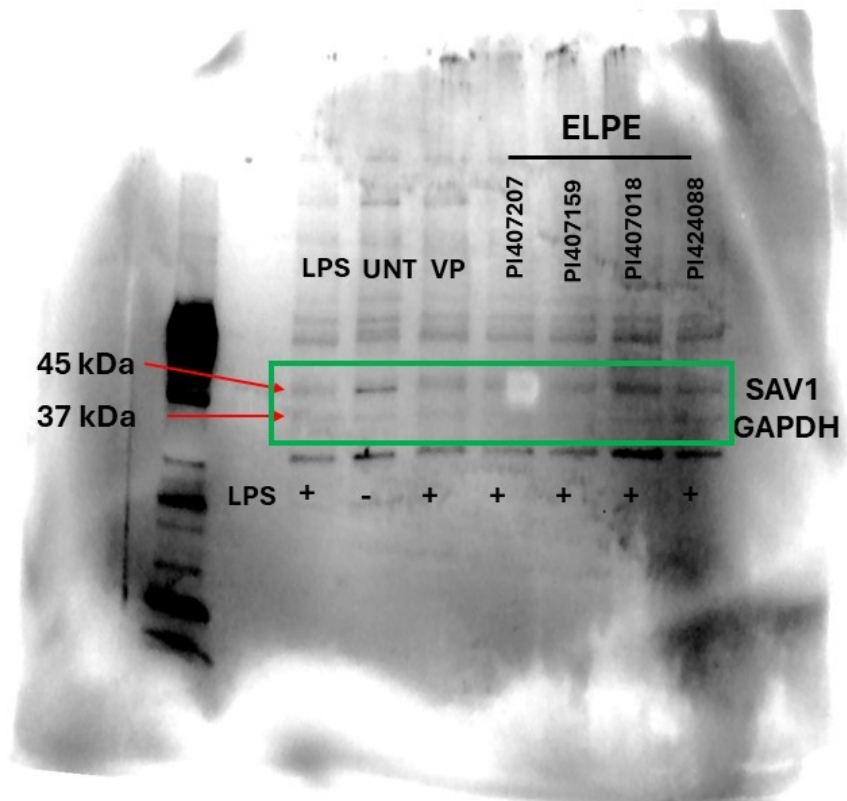

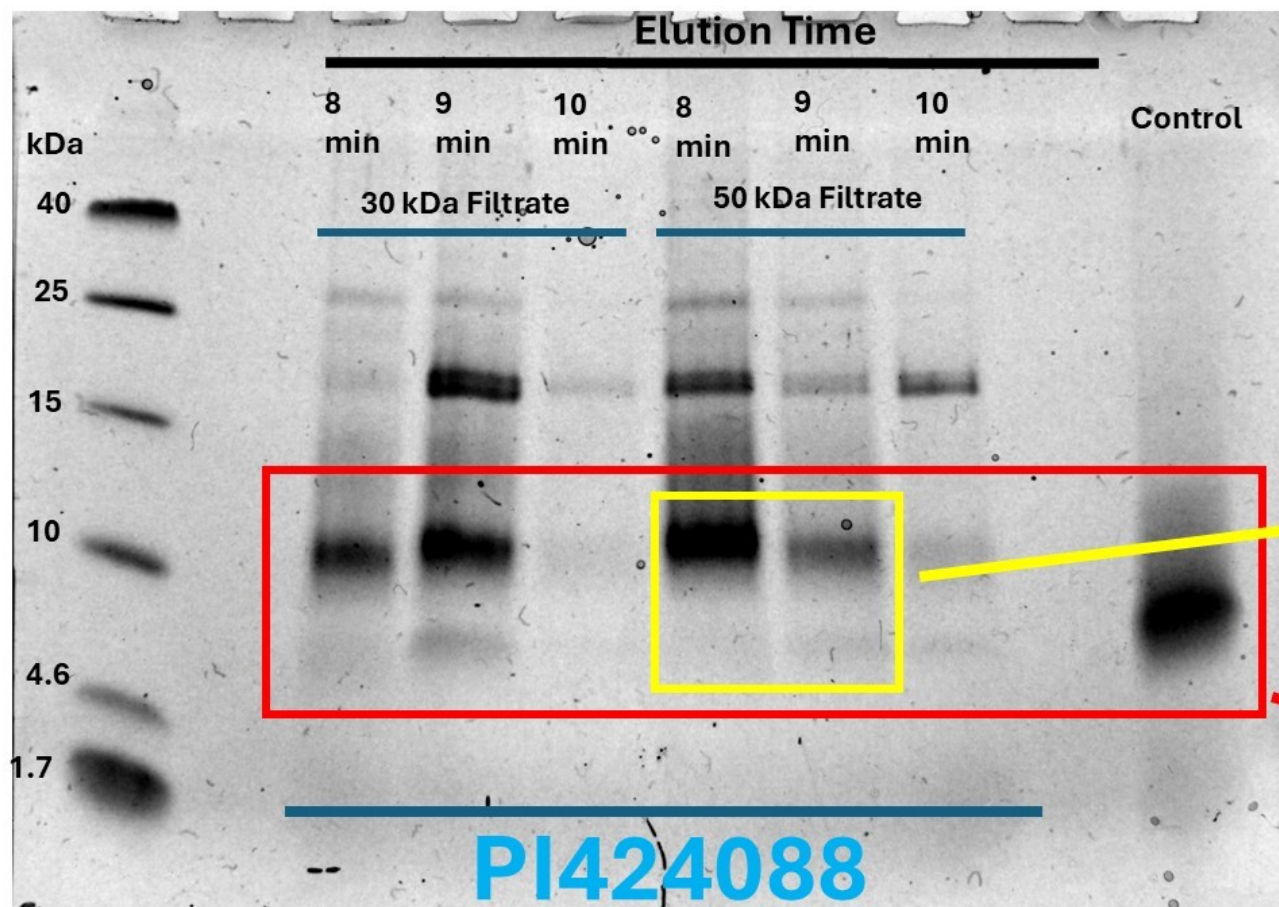

Supplementary  
figure 1

Bands at 5 and 10 kDa  
from fraction 9 and 10  
of 50 kDa filtrate were  
cut and sent to  
Proteomics Center

Possible lunasin  
bands at 10 and 15  
kDa



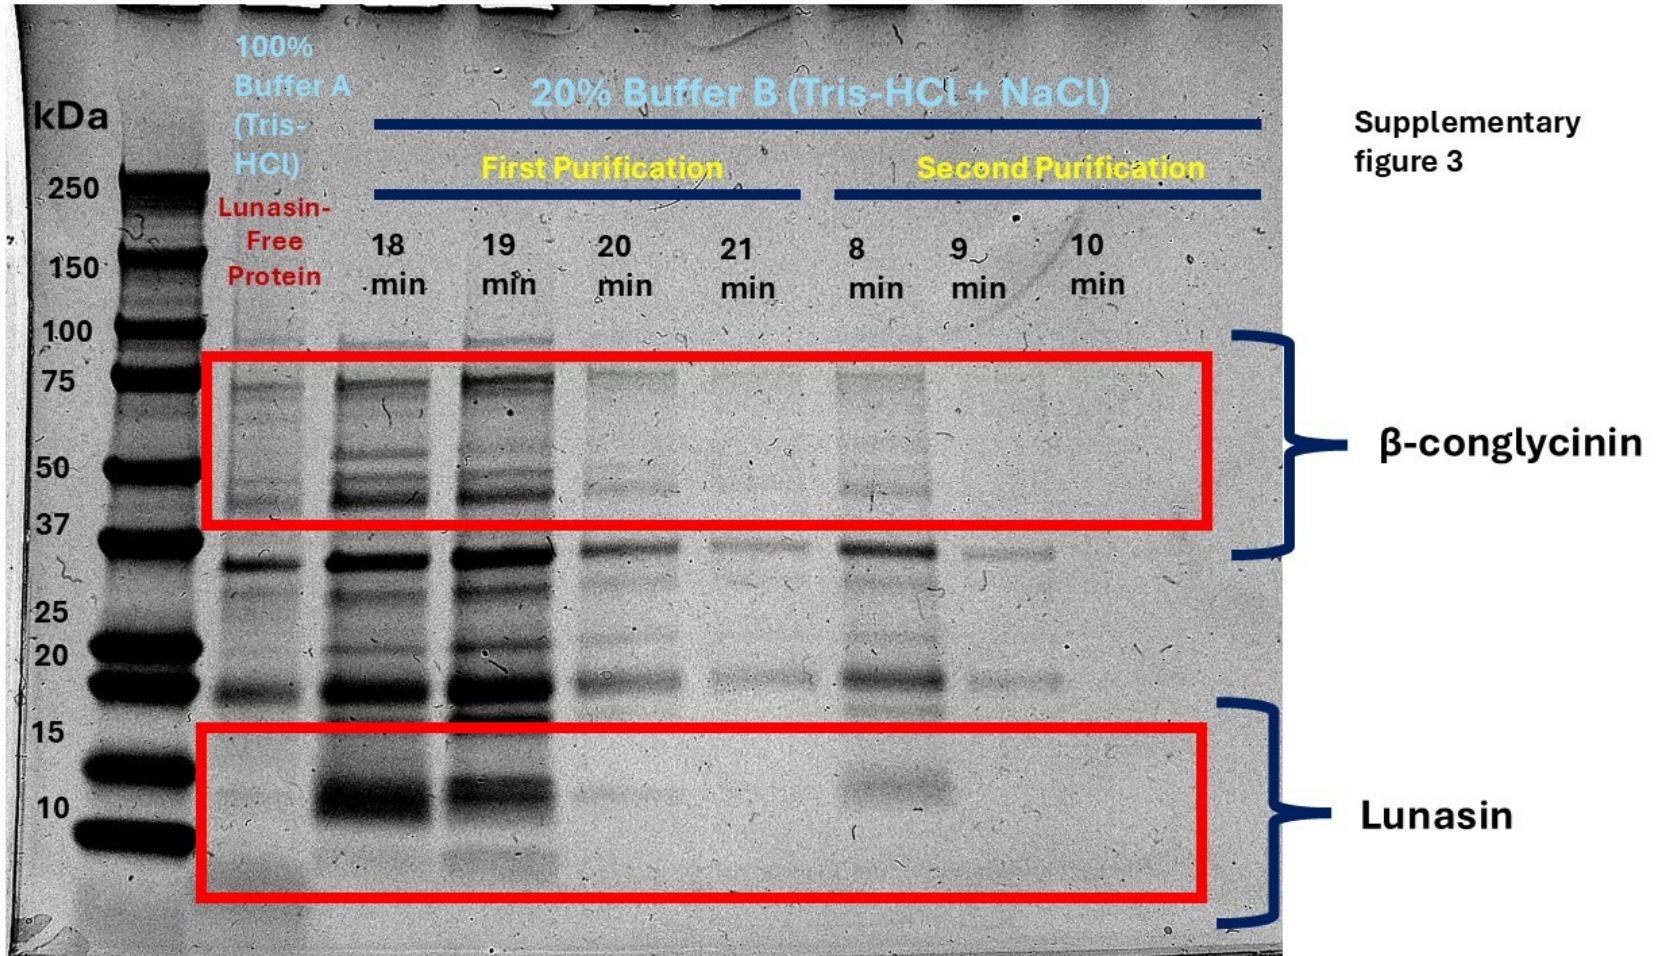

Supplement: d5fo02971f3.pdf [file d5fo02971f3.pdf]
