# Supplementary material for: Proteins and lunasin from Glycine soja inhibited inflammation by activating the Hippo pathway through phosphorylation of YAP1 kinase
Source: Royal Society of Chemistry journal article supplement (doi:10.1039/d5fo02971f), 2026-01-01
Supplement: d5fo02971f2.pdf [file d5fo02971f2.pdf]

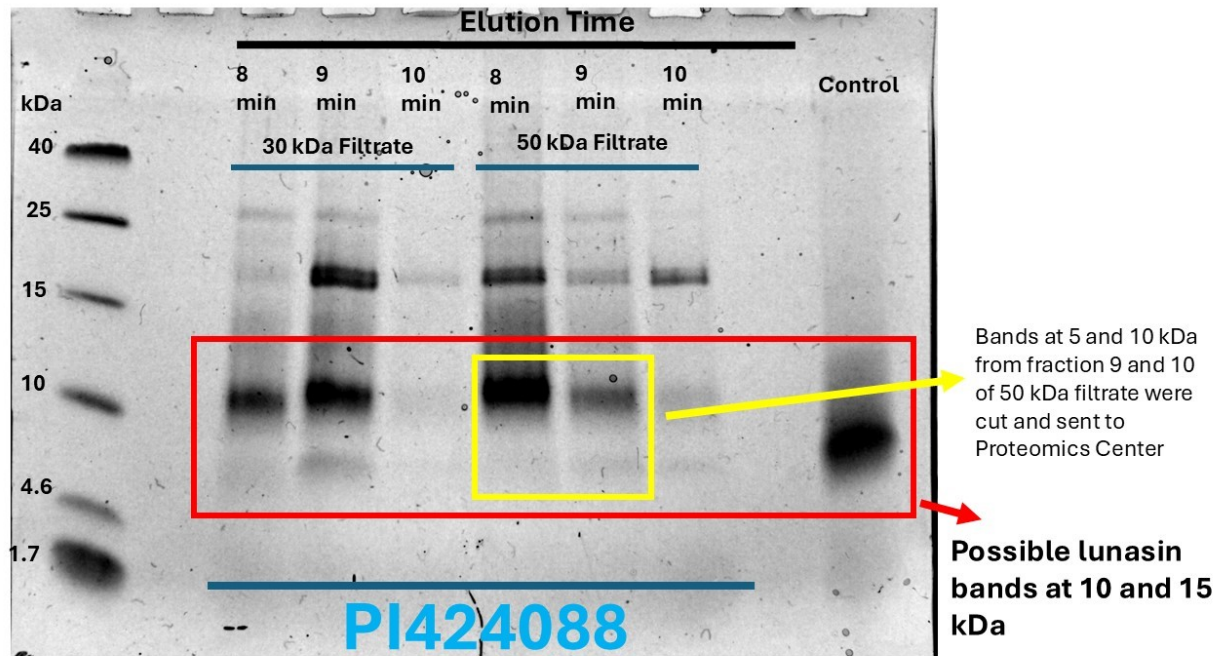

Supplementary Figure 1.

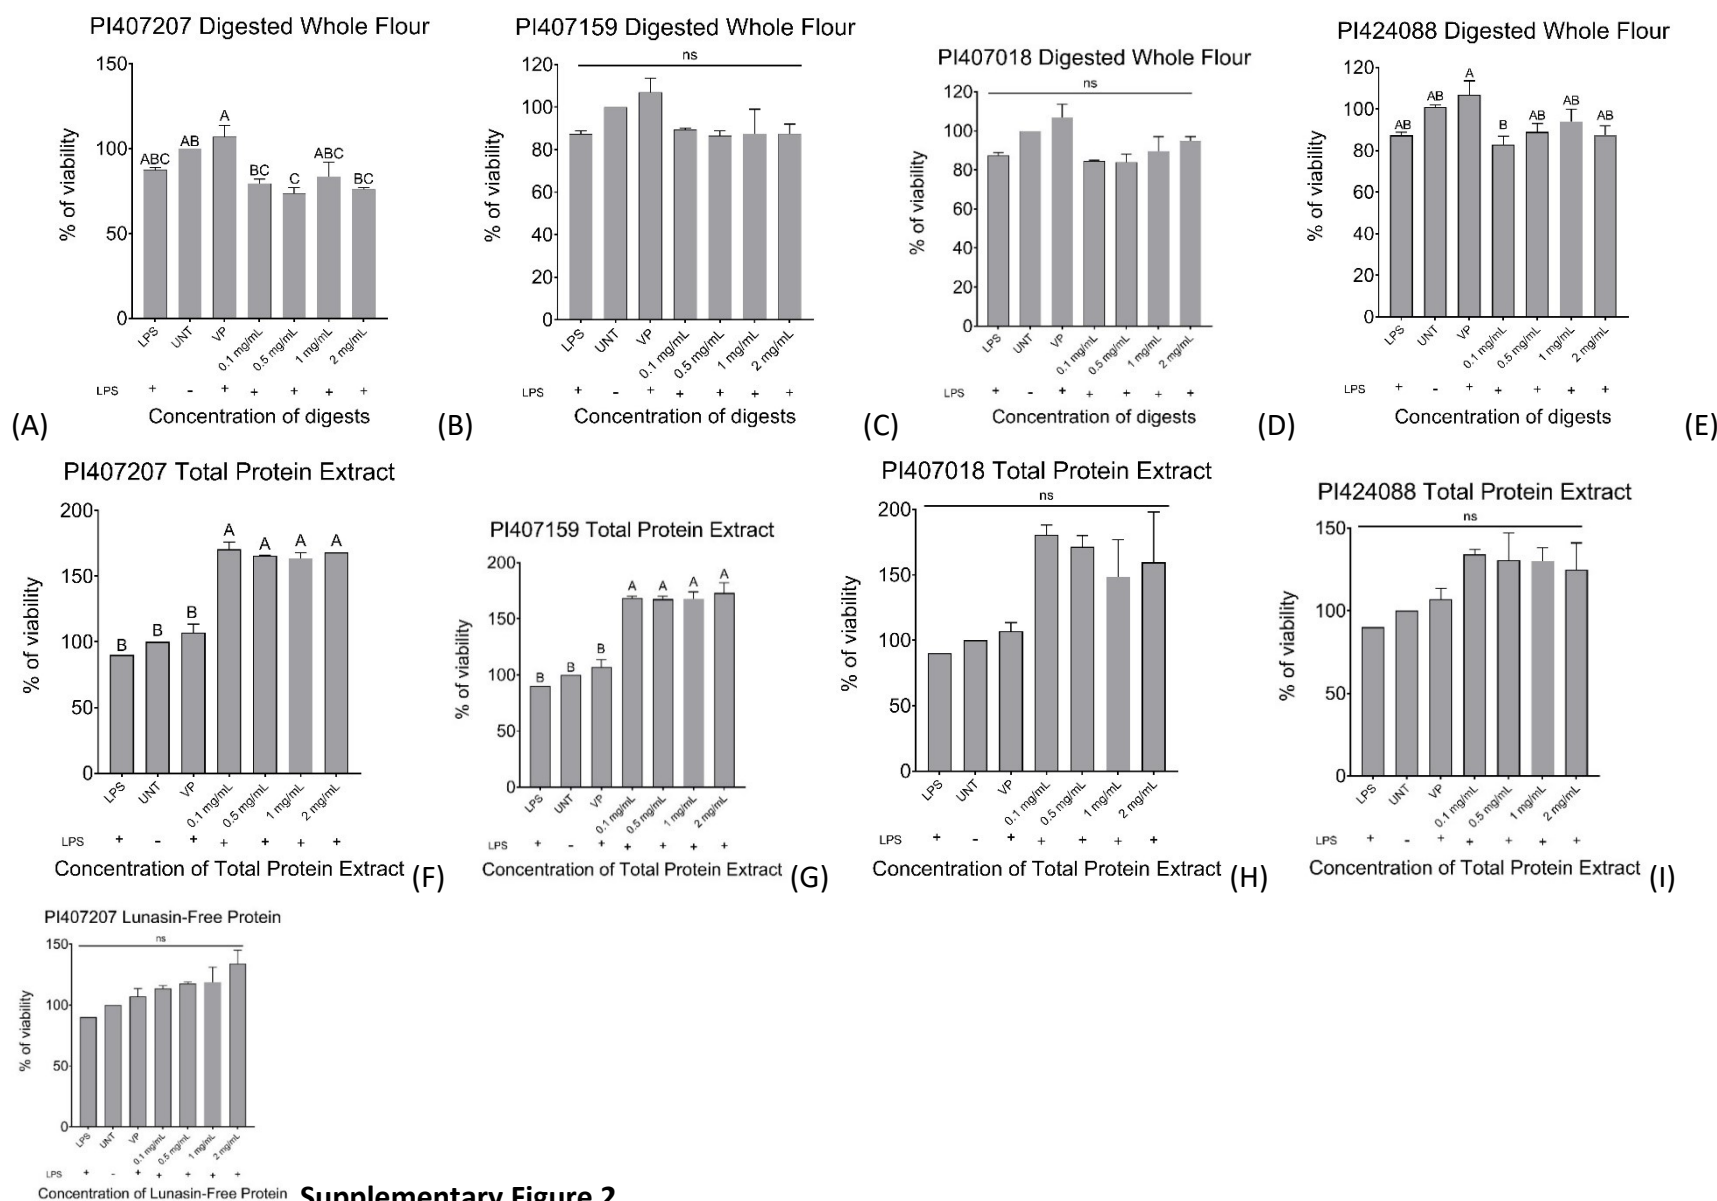

**Supplementary Figure 2.**

PI407159 Lunasin-Free Protein

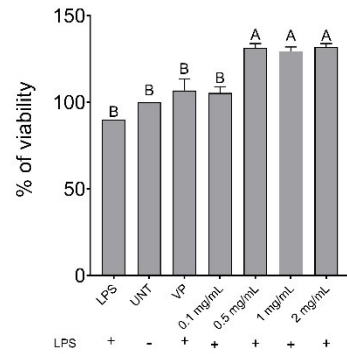

(J) Concentration of Lunasin-Free Protein (K)

PI407018 Lunasin-Free Protein

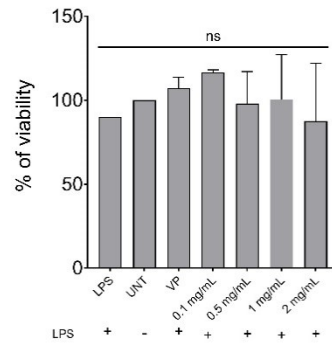

(L) Concentration of Lunasin-Free Protein (M)

PI424088 Lunasin-Free Protein

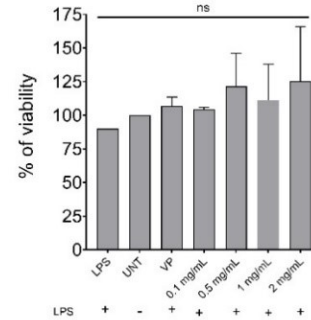

(M) Concentration of Lunasin-Free Protein

PI407207 Purified Lunasin

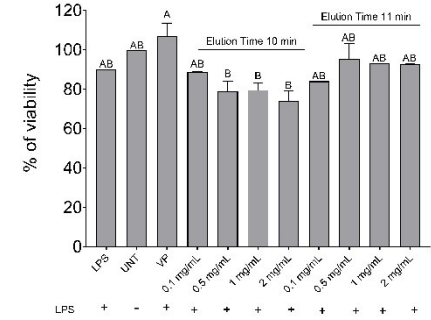

Concentration of purified lunasin

PI407159 Purified Lunasin

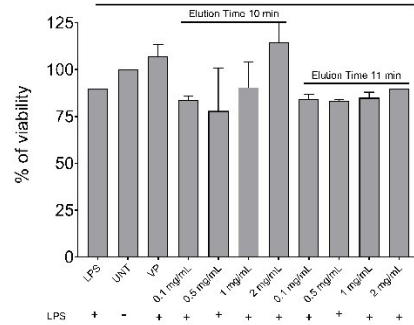

(N) Concentration of purified lunasin (O)

PI407018 Purified Lunasin

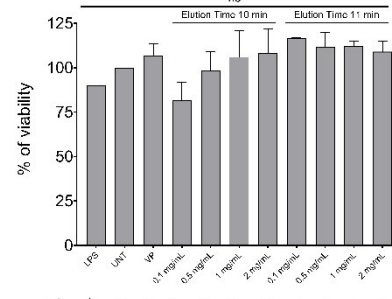

(O) Concentration of purified lunasin (P)

PI424088 Purified Lunasin

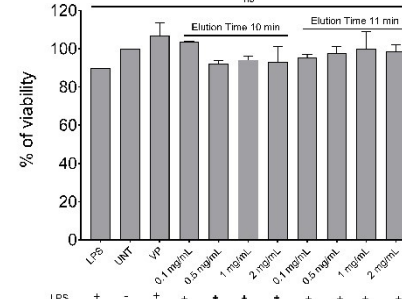

(P) Concentration of purified lunasin (Q)

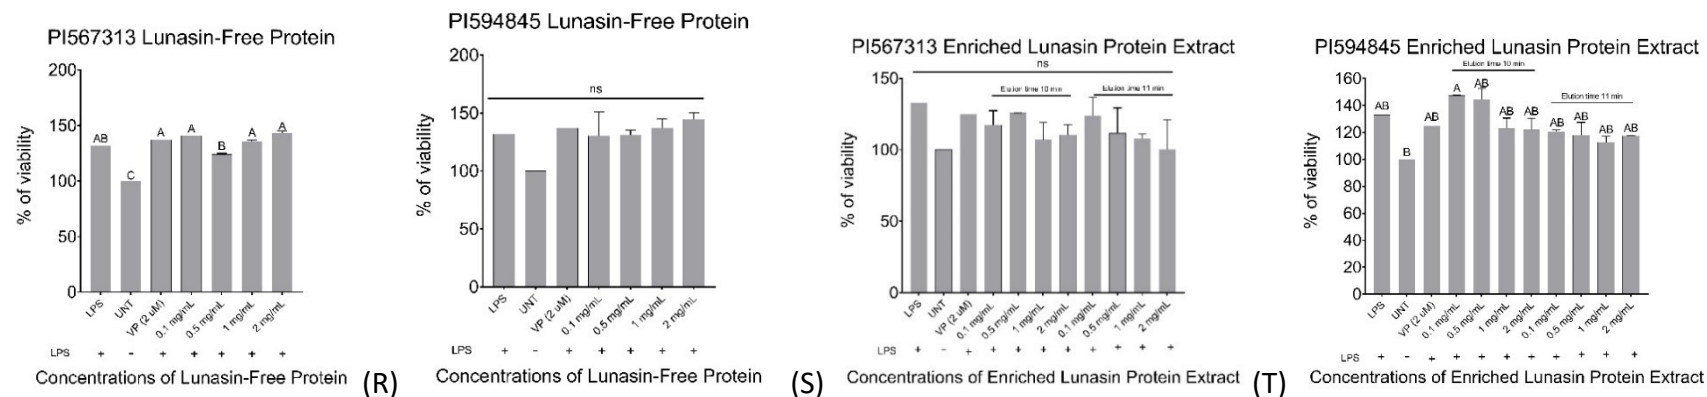

Supplementary Figure 2, Cont...

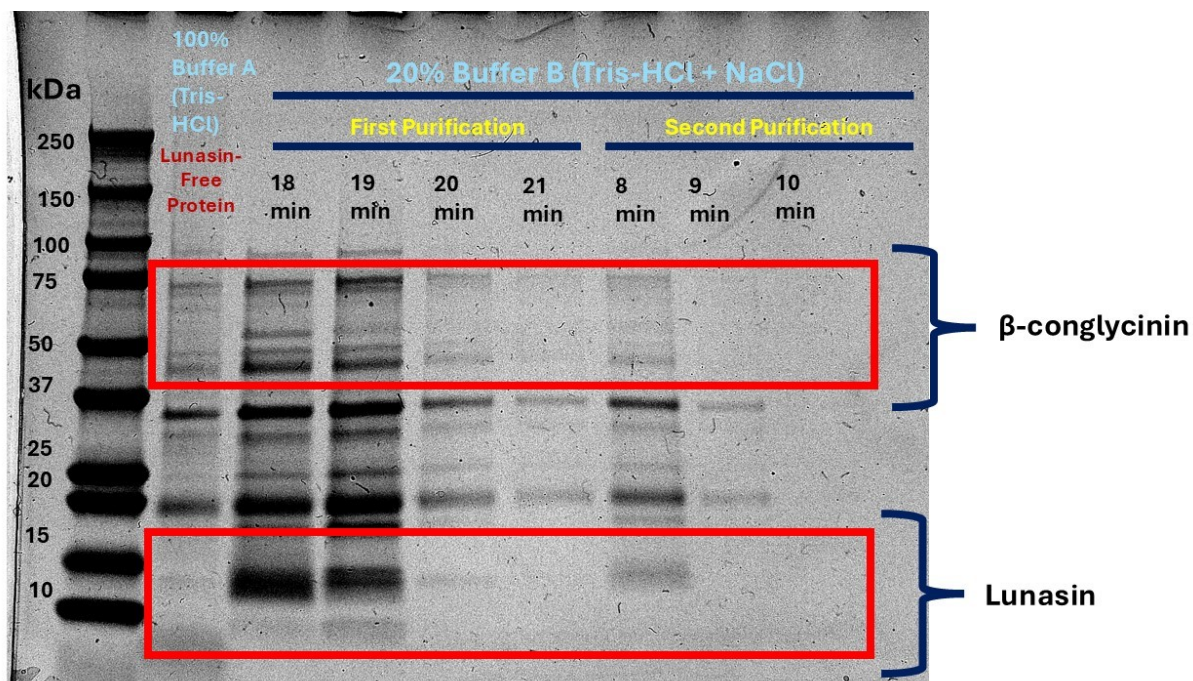

Supplementary Figure 3
